# COLI-NET: Fully Automated COVID-19 Lung and Infection Pneumonia Lesion Detection and Segmentation from Chest CT Images

Isaac Shiri<sup>1</sup>, Hossein Arabi<sup>1</sup>, Yazdan Salimi<sup>1</sup>, Amir Hossein Sanaat<sup>1</sup>, Azadeh Akhavanalaf<sup>1</sup>, Ghasem Hajianfar<sup>2</sup>, Dariush Askari<sup>3</sup>, Shakiba Moradi<sup>4</sup>, Zahra Mansouri<sup>5</sup>, Masoumeh Pakbin<sup>6</sup>, Saleh Sandoughdaran<sup>7</sup>, Hamid Abdollahi<sup>8</sup>, Amir Reza Radmard<sup>9</sup>, Kiara Rezaei-Kalantari<sup>2</sup>, Mostafa Ghelich Oghli<sup>4,10</sup>, Habib Zaidi<sup>1,11,12,13</sup>

- 1- Division of Nuclear Medicine and Molecular Imaging, Geneva University Hospital, Geneva, Switzerland
- 2- Rajaie Cardiovascular Medical and Research Center, Iran University of Medical Science, Tehran, Iran
- 3- Department of Radiology Technology, Shahid Beheshti University of Medical, Tehran, Iran
- 4- Research and Development Department, Med Fanavarn Plus Co., Karaj, Iran
- 5- Department of Biomedical Engineering and Medical Physics, Shahid Beheshti University of medical sciences, Tehran, Iran
- 6- Clinical research development center, Qom university of medical sciences, Qom, Iran
- 7- Department of Radiation Oncology, Shahid Beheshti University of medical sciences, Tehran, Iran
- 8- Department of Radiologic Sciences and Medical Physics, Kerman University of Medical sciences, Kerman, Iran
- 9- Department of Radiology, Shariati Hospital, Tehran University of Medical Sciences, Tehran, Iran
- 10- Department of Cardiovascular Sciences, KU Leuven, Leuven, Belgium
- 11- Geneva University Neurocenter, Geneva University, Geneva, Switzerland
- 12- Department of Nuclear Medicine and Molecular Imaging, University of Groningen, University Medical Center Groningen, Groningen, Netherlands
- 13- Department of Nuclear Medicine, University of Southern Denmark, Odense, Denmark

## First Author:

*Isaac Shiri, MSc*

Geneva University Hospital  
Division of Nuclear Medicine and Molecular Imaging  
CH-1211 Geneva, Switzerland

**Email:** [Isaac.shirilord@unige.ch](mailto:Isaac.shirilord@unige.ch)

## Corresponding Authors:

*Habib Zaidi, Ph.D*

Geneva University Hospital  
Division of Nuclear Medicine and Molecular Imaging  
CH-1211 Geneva, Switzerland

**Tel:** +41 22 372 7258

**Fax:** +41 22 372 7169

**email:** [habib.zaidi@hcuge.ch](mailto:habib.zaidi@hcuge.ch)

1 **Abstract**

2 **Background**

3 We present a deep learning (DL)-based automated whole lung and COVID-19 pneumonia infectious  
4 lesions (COLI-Net) detection and segmentation from chest CT images.

5 **Methods**

6 We prepared 2358 ( 347'259, 2D slices) and 180 (17341, 2D slices) volumetric CT images along with  
7 their corresponding manual segmentation of lungs and lesions, respectively, in the framework of a  
8 multi-center/multi-scanner study. All images were cropped, resized and the intensity values clipped  
9 and normalized. A residual network (ResNet) with non-square Dice loss function built upon  
10 TensorFlow was employed. The accuracy of lung and COVID-19 lesions segmentation was evaluated  
11 on an external RT-PCR positive COVID-19 dataset (7'333, 2D slices) collected at five different  
12 centers. To evaluate the segmentation performance, we calculated different quantitative metrics,  
13 including radiomic features.

14 **Results**

15 The mean Dice coefficients were  $0.98 \pm 0.011$  (95% CI, 0.98-0.99) and  $0.91 \pm 0.038$  (95% CI, 0.90-0.91)  
16 for lung and lesions segmentation, respectively. The mean relative Hounsfield unit differences were  
17  $0.03 \pm 0.84\%$  (95% CI, -0.12 - 0.18) and  $-0.18 \pm 3.4\%$  (95% CI, -0.8 - 0.44) for the lung and lesions,  
18 respectively. The relative volume difference for lung and lesions were  $0.38 \pm 1.2\%$  (95% CI, 0.16-0.59)  
19 and  $0.81 \pm 6.6\%$  (95% CI, -0.39-2), respectively. Most radiomic features had a mean relative error less  
20 than 5% with the highest mean relative error achieved for the lung for the *Range* first-order feature (-  
21 6.95%) and *least axis length* shape feature (8.68%) for lesions.

22 **Conclusion**

23 We set out to develop an automated deep learning-guided three-dimensional whole lung and infected  
24 regions segmentation in COVID-19 patients in order to develop fast, consistent, robust and human  
25 error immune framework for lung and pneumonia lesion detection and quantification.

26 **Keywords:** X-ray CT, COVID-19, pneumonia, deep learning, segmentation.

27

28

## 1 **I. Introduction**

2 The recent pandemic of severe acute respiratory syndrome coronavirus 2 (SARS-CoV-2) disease  
3 (COVID-19) is posing great health concerns globally (1, 2). The COVID-19 pandemic has resulted in  
4 loss of lives, health and economic issues (3). Although, a large number of trials have been conducted  
5 to produce vaccines and/or treat COVID-19, a specific vaccine or therapy is still lacking (4, 5). For the  
6 diagnosis of COVID-19, Reverse Transcription-Polymerase Chain Reaction (RT-PCR) is a high  
7 sensitive molecular test, but bears inherently a number of limitations (6, 7). Furthermore, previous  
8 studies have indicated that thoracic Computed Tomography (CT) is a fast and highly sensitive  
9 approach for COVID-19 detection and management (8, 9). In this regard, dedicated ultra low-dose CT  
10 scanning protocols were recently devised (10).

11 In connection with the use of CT in COVID-19 management, a wide range of qualitative and  
12 quantitative studies have been carried out for diagnostic, prognostic and longitudinal follow up of  
13 patients (11-14). In these studies, whole lungs or infectious lesions were analyzed and several patterns  
14 and features were found to have high diagnostic and prognostic value (13, 15-19). However, accurate  
15 segmentation of lungs and infectious pneumonia lesions remains challenging (20). Hence,  
16 segmentation is the main issue impacting the outcome of both qualitative and quantitative studies (12,  
17 20, 21). Although several segmentation approaches including manual delineation, semi-automated (22)  
18 and fully automated (21) techniques have been applied to CT images for COVID-19 management,  
19 they are still facing serious challenges to produce robust and dependable outcomes.

20 In medical image segmentation, particularly whole 3D volumes definition and big data analysis,  
21 manual delineation requires experienced trained radiologists, is time consuming, labor-intensive, and  
22 suffers from inter- and intra-observer variability concerns (23, 24). Whole lung segmentation is a  
23 pivotal step for further analysis, including extraction of the percentage of infection, well aerated  
24 portion of the lung, and enabling radiomics and deep learning analysis of COVID-19 patients (15, 18).  
25 Conventional algorithms, including rule-based and atlas-based, performed relatively well on normal  
26 and mild disease chest CT, but might fail in COVID-19 patients lung segmentation because of  
27 different stage of disease with different levels of severity (20). Furthermore, developing a fully  
28 automatic tool for lung and pneumonia COVID-19 lesions is highly desired owing to rapid changes in  
29 appearance and manifestation at different stages of the disease (13, 20).

30 Artificial intelligence (AI) algorithms, particularly its two major subcategories, machine learning  
31 (ML) and deep learning (DL), have been widely used for medical image analysis (25-30) and more  
32 recently in the segmentation of lung and pneumonia infectious lesions from chest CT images of  
33 COVID-19 patients (16). These studies reported that AI improved the accuracy of lesion  
34 detection/segmentation and reduced the bias associated with conventional approaches. In a study by  
35 Zheng *et al.* (31), a weakly-supervised deep learning algorithm was applied to chest CT images for  
36 automatic COVID-19 detection. Fan *et al.* (32) presented a COVID-19 lung infection segmentation

1 deep network (Inf-Net) based on semi-supervised learning. Furthermore, a number of deep learning  
2 algorithms, namely UNet, UNet++, V-Net, Attention-UNet, Gated-UNet and Dense-UNet were used  
3 for COVID-19 lesion detection and segmentation from chest CT images (33, 34).

4 CT images are commonly acquired on various scanner models using different imaging protocols,  
5 and as such, the resulting datasets are heterogeneous, which might lead to inaccuracy in the developed  
6 models. Training a robust and generalizable deep learning model requires a large clean annotated  
7 dataset (35). Owing to the relatively recent outbreak of COVID-19 pandemic, producing a large  
8 labeled COVID-19 image dataset is impractical. Transfer learning (TL) has received attention to  
9 address the lack of large datasets for the implementation of machine/deep learning-based algorithms  
10 (36, 37). Various TL-based strategies were used for transferring knowledge from different domains,  
11 including natural images to medical images to develop more robust and generalizable models (37).

12 In the present study, we developed a DL-based automated detection and segmentation of lung and  
13 COVID-19 pneumonia infectious lesions (COLI-Net) from chest CT images. In this work, large lung  
14 and COVID-19 lesions datasets and TL used to train a residual network (ResNet) for lung and  
15 pneumonia infectious lesions segmentation.

16  
17  
18  
19  
20  
21  
22  
23  
24  
25  
26  
27  
28  
29  
30  
31  
32  
33  
34  
35  
36

## 1 **II. Material and Methods**

### 2 **Clinical studies**

3 For lung and COVID-19 lesions segmentation, we prepared 2358 (347259, 2D slices) and 180 (17341,  
4 2D slices) multi-centric and multi-vendor volumetric CT images with lung and COVID-19 lesion  
5 segmentations.

6

#### 7 *Lung datasets*

8 For lung segmentation training, we used 2298 chest CT images (328205, 2D slices) with different  
9 pathologies from different centers, including 800 normal subjects without any lung abnormalities from  
10 Iran Center#1 ( 81347, 2D slices), 400 images of non-small cell lung carcinoma patients from Cancer  
11 Imaging Archive (TCIA) (38-40) (48568, 2D slices), 200 non-COVID-19 pneumonia (49465, 2D  
12 slices) and 898 (148825, 2D slices) RT-PCR positive COVID-19 patients from Iran Center#2. All  
13 images were manually segmented by experienced radiologists to delineate the lungs.

14

#### 15 *COVID-19 lesions datasets*

16 For COVID-19 lesions segmentation training, we used 120 (9557, 2D slices) RT-PCR positive image  
17 datasets, including 90 (8338, 2D slices) datasets from 3 different centers in Iran (Centers#1, #2, #3)  
18 where the infectious lesions were manually segmented by experienced radiologists, in addition to 30  
19 (1250, 2D slices) CT images from Russia (41).

#### 20 *Image preprocessing*

21 Prior to network training, all images were cropped and resized to 296×216 matrix size. Image  
22 intensities were clipped between -1024 and 300 Hounsfield units and then normalized to a range [0 -  
23 1.3].

#### 24 *Residual neural network*

25 The residual network (ResNet) proposed by Li *et al.* (42, 43) built upon TensorFlow was used for lung  
26 and COVID-19 lesions segmentation. The ResNet is composed of 20 convolutional layers where  
27 different dilation factors were used for different levels of feature extraction (zero dilatation factor for  
28 low-level, two dilatation factors for medium-level, and four dilatation factors for high-level). Every  
29 two layers were linked together with residual connections (Figure 1). Non-square Dice was used as  
30 loss function. provides descriptive detail of ResNet.

31

32

33

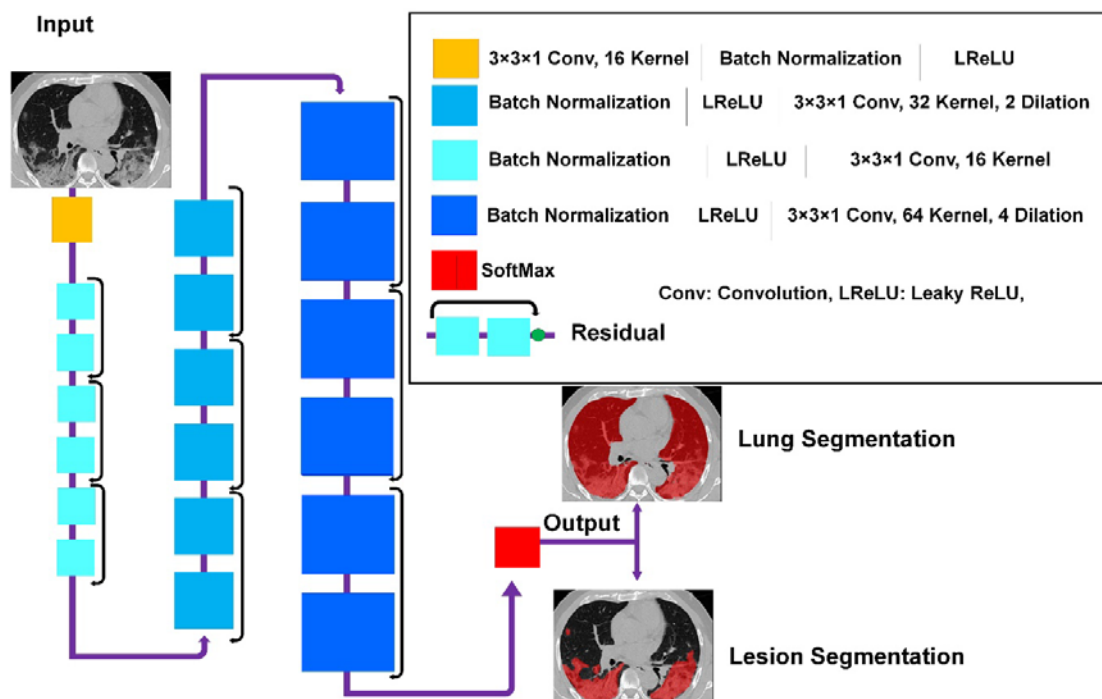

1

2 **Figure 1.** Architecture of the deep residual neural network (ResNet) along with details of the  
 3 associated layers. Conv, convolutional kernel; LReLU, leaky rectified linear unit; SoftMax, Softmax  
 4 function; Residual, residual connection.

5 *Training and evaluation*

6 Lung and COVID-19 lesions training was performed on 2D slices owing to the wide variability in  
 7 slice thicknesses across the datasets from the different centers. For lung segmentation training, we  
 8 used 2178 3D CT images (347259, 2D slices). For COVID-19 lesions segmentation, we used  
 9 pretrained lung segmentation network as initial weights followed by fine-tuning for lesion  
 10 segmentation of 120 3D CT images (9557, 2D slices). Body fine-tuning approaches were used for  
 11 transfer learning where all pre-trained weights of lung segmentation were used as initial weights for  
 12 lesion segmentation. The assessment of the quality of segmentations was performed independently on  
 13 RT-PCR positive COVID-19 datasets from different centers, including 20 images (2214, 2D slices)  
 14 from Center#1 (Iran1), 10 images (2552, 2D slices) from Center#2 (Iran2), 20 images (1250, 2D  
 15 slices) from center#3 (Russia) (41), 10 images (939, 2D slices) from Center#4 (China) (44, 45) and 10  
 16 images (829, 2D slices) from center#5 (Italy<sup>1</sup>) (45). Overall, the evaluation was preformed on 7333 2D  
 17 slices from different centers.

18

<sup>1</sup> <http://medicalsegmentation.com/covid19/>  
<https://www.medseg.ai/>

1    **Evaluation**

2    To evaluate the performance of image segmentation, we calculated Dice similarity coefficient, Jaccard  
3    index, false negative, false positive, mean Hausdorff distance, and mean surface distance. In addition,  
4    different volume indices were exploited to quantify the portion of infection, including relative volume  
5    difference (%), relative volume difference of lesion/lung relative volume (%), absolute relative volume  
6    difference (%), absolute relative volume difference of lesion/lung relative volume (%). Hounsfield unit  
7    (mean) relative difference (%), and Hounsfield unit (mean) absolute relative difference (%) were  
8    calculated for lungs and COVID-19 lesions from different segmentations of CT images. Further details  
9    about the evaluated parameters are provided in the Supplemental Material. In addition, we evaluated  
10   the impact of the segmentation on 17 first-order and 10 shape radiomic features in both lungs and  
11   COVID-19 lesions. The list of radiomic features are presented in Supplemental Table 1.

12  
13  
14  
15  
16  
17  
18  
19  
20  
21  
22  
23  
24  
25  
26  
27  
28  
29  
30  
31  
32  
33  
34  
35  
36

1 **Results**

2 Figures 2 and 3 compares visually in 2D and 3D views for different external validation sets of lungs  
3 and lesions delineated manually by experienced radiologists and automatically by the deep learning  
4 model. Additional results from the external validation sets are provided in Supplemental Figures 1-13  
5 (2D views) and 14-17 (3D views). Overall, there is good agreement between manual and predicted  
6 lung and infectious lesions segmentation in the different datasets. Despite the variability of the  
7 subjects among the different centers, COLI-Net performed consistently well in multi-centric and  
8 multi-scanner setting. What stands out from these results is that COLI-Net can detect and segment  
9 infectious regions (within lesion segmentation) while excluding arteries and tracheae in lung  
10 segmentation.

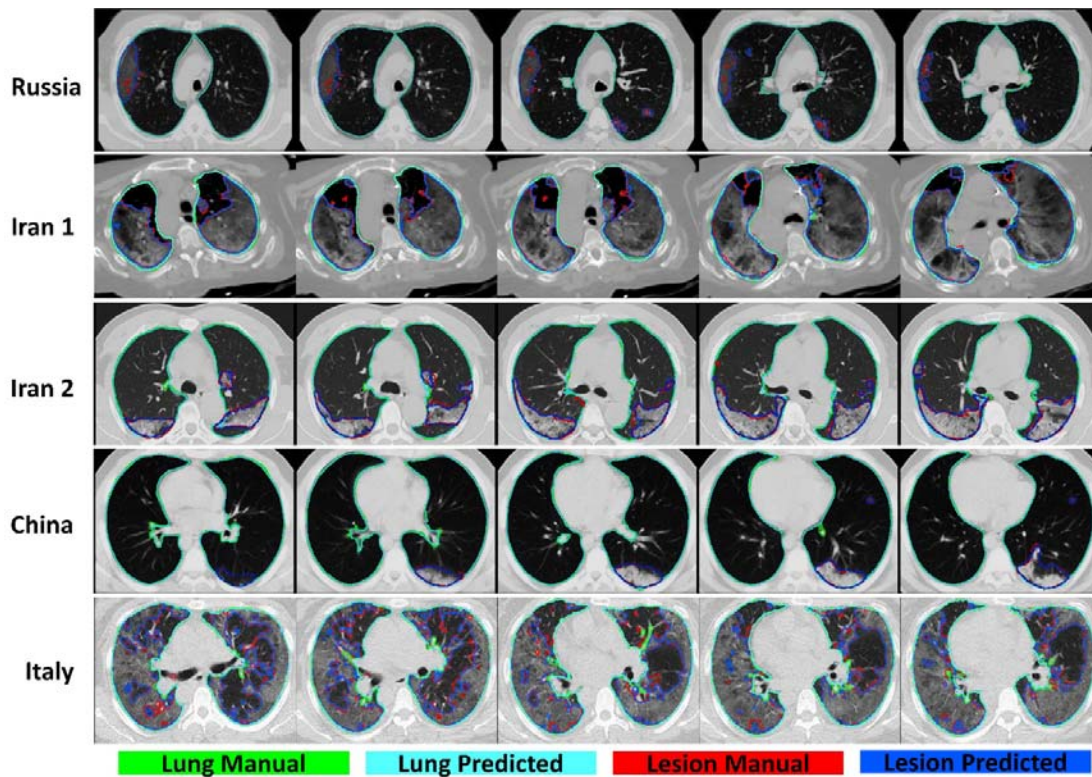

11  
12 **Figure 2.** Representative manual and predicted segmentation (2D views) of lungs and COVID-19  
13 lesions for 5 different cases from different datasets.

14  
15  
16  
17  
18  
19  
20



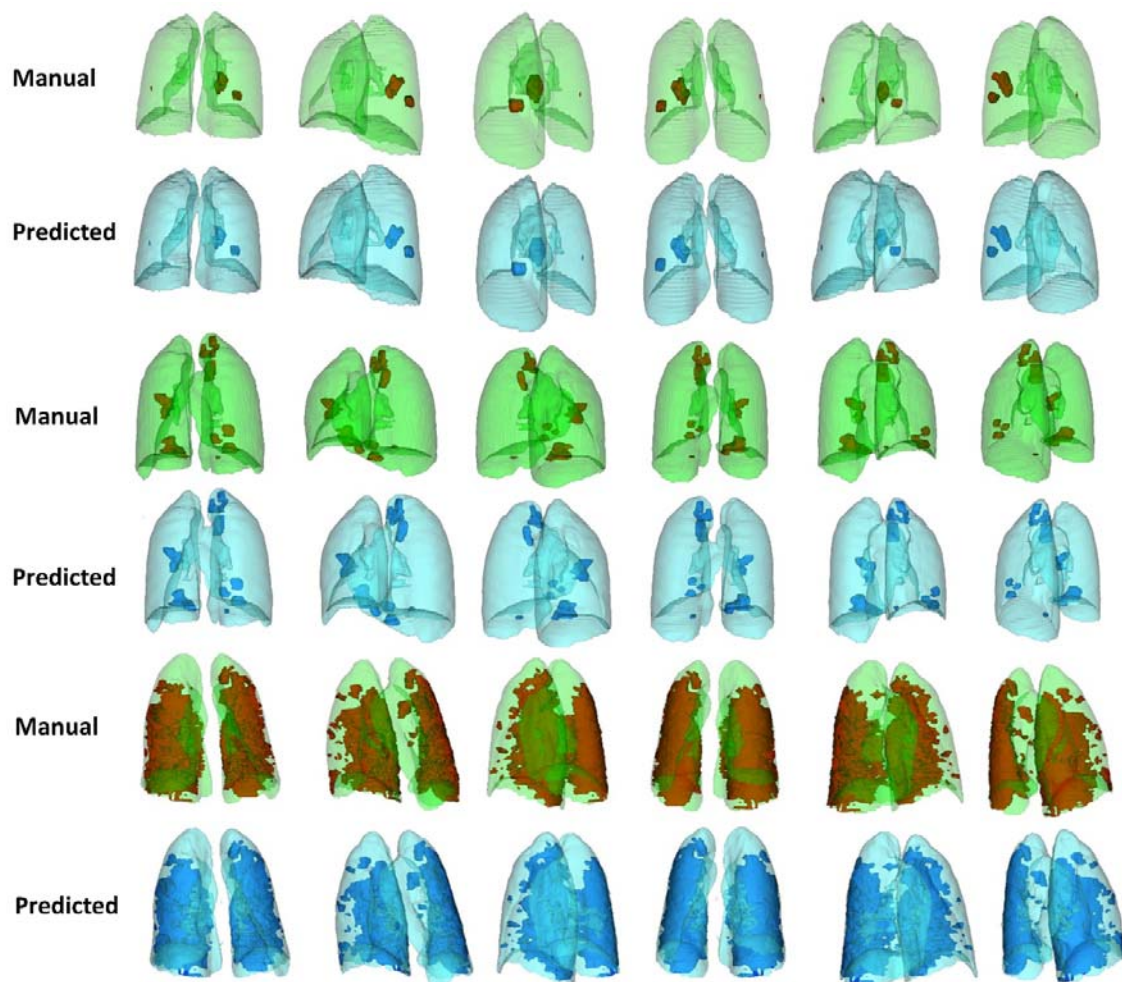

1

2 **Figure 3.** Representative manual and predicted segmentation (3D views) of lungs and COVID-19  
3 lesions for 3 different cases from different datasets.

4 Table 1 summarizes segmentation quantification metrics for lungs and COVID-19 lesions. It can be  
5 seen that the mean Dice coefficients were  $0.98 \pm 0.011$  (95% CI, 0.98-0.99) and  $0.91 \pm 0.038$  (95% CI,  
6 0.90-0.91) for lung and lesions segmentation, respectively. The mean Jaccard index was  $0.97 \pm 0.022$   
7 (95% CI, 0.97-0.97) and  $0.83 \pm 0.062$  (95% CI, 0.82-0.84) for lung and COVID-19 lesions  
8 segmentation, respectively. Supplemental Tables 2-7 summarize lung and lesion segmentation  
9 quantification metrics for different external validation sets.

10 Table 2 summarizes the impact of lung and lesions segmentations on mean Hounsfield unit and  
11 volume calculation. Mean relative HU differences (%) of  $0.03 \pm 0.84$  (95% CI, -0.12 - 0.18) and  $-0.18$   
12  $\pm 3.4$  (95% CI, -0.8 - 0.44) were achieved for lungs and lesions, respectively. The relative volume  
13 difference for the lung was  $0.38 \pm 1.2$  (95% CI, 0.16-0.59) whereas it was  $0.81 \pm 6.6$  (95% CI, -0.39-2)  
14 for lesions. The results obtained from the mean Hounsfield unit and volume calculation for lung and  
15 infectious lesions for the different external validation sets are presented in Supplemental Tables 8-11.

1 **Table 1.** Descriptive statistics of quantitative metrics for lung and COVID-19 lesions in the different  
2 datasets.

|                | <b>Metric</b>              | <b>Min</b> | <b>Max</b> | <b>Mean ± SD</b> | <b>95% CI</b> |
|----------------|----------------------------|------------|------------|------------------|---------------|
| <b>Lung</b>    | Dice                       | 0.92       | 0.99       | 0.98 ± 0.011     | 0.98 - 0.99   |
|                | Jaccard                    | 0.86       | 0.99       | 0.97 ± 0.022     | 0.97 - 0.97   |
|                | False Negative             | 0.003      | 0.086      | 0.013 ± 0.011    | 0.011 - 0.015 |
|                | False Positive             | 0.002      | 0.073      | 0.017 ± 0.014    | 0.014 - 0.019 |
|                | Average Hausdorff Distance | 0.005      | 0.14       | 0.022 ± 0.026    | 0.018 - 0.027 |
|                | Mean Surface Distance      | 0.005      | 0.17       | 0.026 ± 0.028    | 0.021 - 0.031 |
| <b>Lesions</b> | Dice                       | 0.8        | 0.98       | 0.91 ± 0.038     | 0.9 - 0.91    |
|                | Jaccard                    | 0.66       | 0.96       | 0.83 ± 0.062     | 0.82 - 0.84   |
|                | False Negative             | 0.015      | 0.23       | 0.086 ± 0.044    | 0.078 - 0.094 |
|                | False Positive             | 0.024      | 0.32       | 0.098 ± 0.055    | 0.088 - 0.11  |
|                | Average Hausdorff Distance | 0.043      | 5.6        | 0.42 ± 0.73      | 0.29 - 0.55   |
|                | Mean Surface Distance      | 0.046      | 6.1        | 0.45 ± 0.79      | 0.31 - 0.59   |

3  
4  
5  
6  
7

**Table 2.** Descriptive statistics of volume index for lung and COVID-19 lesions in the different  
6 datasets.

|                | <b>Metric</b>                      | <b>Min</b> | <b>Max</b> | <b>Mean ± SD</b> | <b>95% CI</b> |
|----------------|------------------------------------|------------|------------|------------------|---------------|
| <b>Lung</b>    | Relative Mean HU Diff (%)          | -4.2       | 3.9        | 0.03 ± 0.84      | -0.12 - 0.18  |
|                | Absolute Relative Mean HU Diff (%) | 0.006      | 4.2        | 0.52 ± 0.66      | 0.4 - 0.64    |
|                | Relative Volume Diff (%)           | -3.1       | 6.4        | 0.38 ± 1.2       | 0.16 - 0.59   |
|                | Absolute Relative Volume Diff (%)  | 0.004      | 6.4        | 0.89 ± 0.88      | 0.73 - 1      |
| <b>Lesions</b> | Relative Mean HU Diff (%)          | -9.8       | 10         | -0.18 ± 3.4      | -0.8 - 0.44   |
|                | Absolute Relative Mean HU Diff (%) | 0.026      | 10         | 2.4 ± 2.5        | 1.9 - 2.8     |
|                | Relative Volume Diff (%)           | -14        | 21         | 0.81 ± 6.6       | -0.39 - 2     |
|                | Absolute Relative Volume Diff (%)  | 0.018      | 21         | 4.8 ± 4.6        | 4 - 5.6       |

8  
9  
10  
11  
12  
13  
14  
15  
16  
17  
18  
19

Figures 4 and 5 depict the Dice similarity index, Jaccard, mean Hounsfield unit, and volume difference box plots for lung and lesions segmentation, respectively. Supplemental Figures 18 and 19 show box plots of Hounsfield unit absolute relative difference (%), absolute relative volume difference (%), false negative, false positive, average Hausdorff distance, and mean surface distance for lung and lesions.

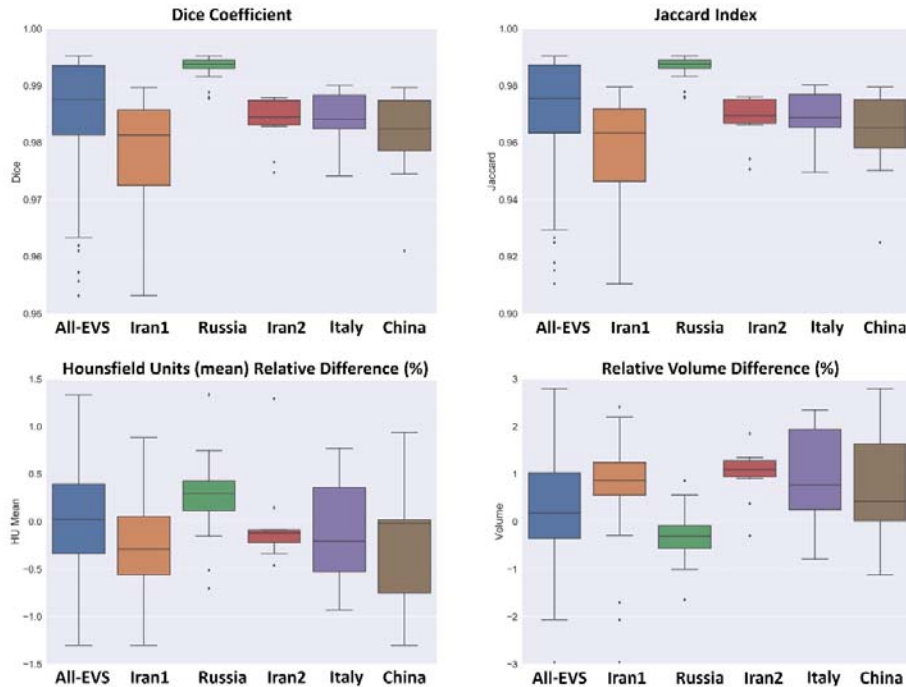

1

2 **Figure 4.** Box plots comparing various quantitative imaging metrics for lung segmentation, including  
3 Dice coefficient, Jaccard index, Hounsfield units (mean) relative difference (%) and relative volume  
4 difference (%).

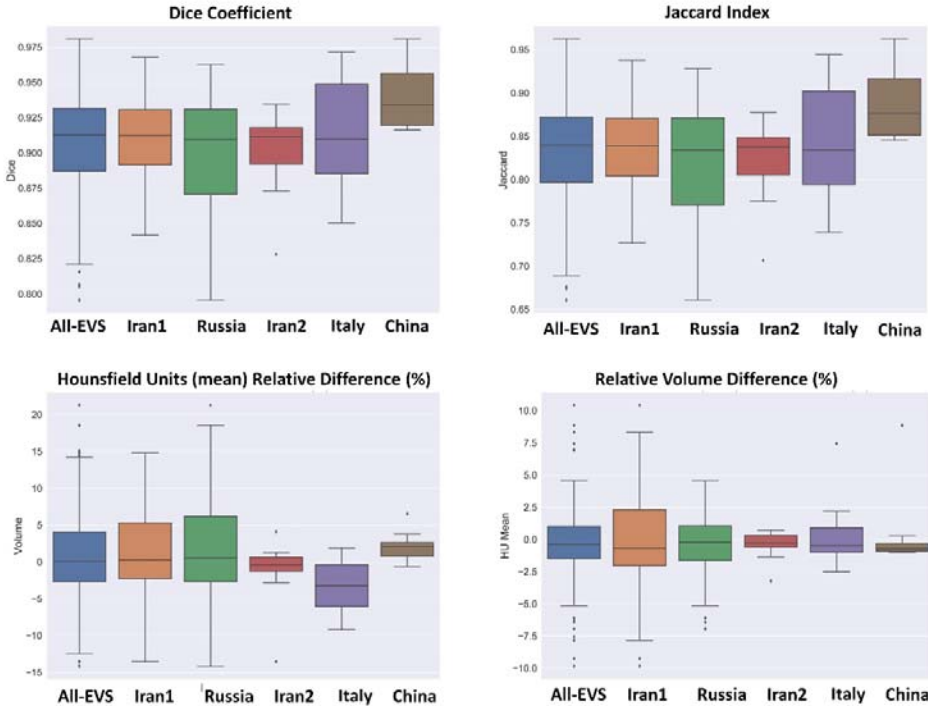

5

6 **Figure 5.** Box plots comparing various quantitative imaging metrics for COVID-19 lesions  
7 segmentation, including Dice coefficient, Jaccard index, Hounsfield units (mean) relative difference  
8 (%). and relative volume difference (%).

1 Descriptive statistics of relative volume (lesion/lung) indices are presented in Table 3. A relative  
 2 error of  $0.22 \pm 6.3$  (95% CI, -0.95-1.4) and absolute relative error of  $4.7 \pm 4.2$  (95% CI, 3.9-5.5) were  
 3 achieved for relative volume (lesion/lung). Supplemental Tables 12 and 13 summarize the results  
 4 obtained for the relative volume (lesion/lung) index for different external validation sets. Figure 6  
 5 depicts boxplot of manual and predicted relative volume lesion/lung differences (%) and  
 6 absolute/relative error of lesion/lung relative volume errors (%) for different external validation sets.

7  
 8 **Table 3.** Descriptive statistics of relative volume index.

| Metric                                               | Min   | Max  | Mean $\pm$ SD   | 95% CI       |
|------------------------------------------------------|-------|------|-----------------|--------------|
| Manual segmentation relative volume (Lesion/Lung)    | 0.001 | 0.82 | $0.13 \pm 0.19$ | 0.095 - 0.16 |
| Predicted segmentation relative volume (Lesion/Lung) | 0.001 | 0.84 | $0.13 \pm 0.19$ | 0.094 - 0.16 |
| RE Volume Diff Lesion/Lesion (%)                     | -14   | 16   | $0.22 \pm 6.3$  | -0.95 - 1.4  |
| ARE Volume Diff Lesion/Lesion (%)                    | 0.004 | 16   | $4.7 \pm 4.2$   | 3.9 - 5.5    |

9

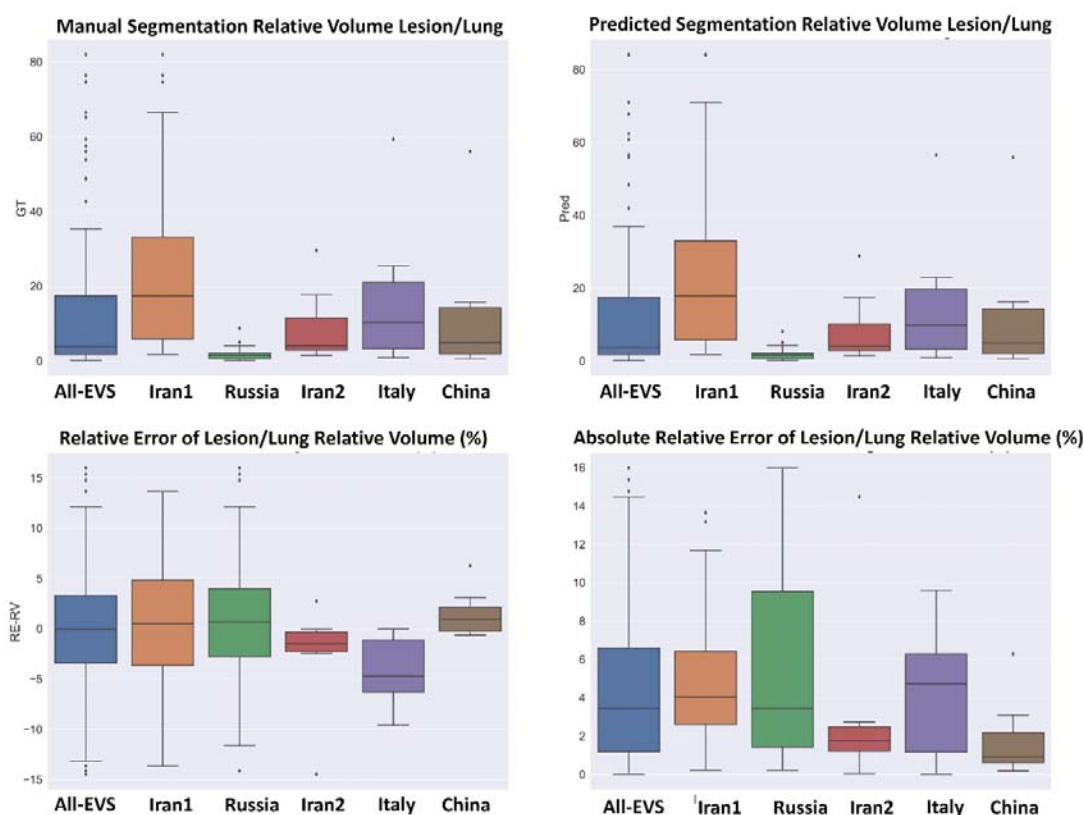

10

11 **Figure 6.** Box plots comparing various quantitative imaging metrics for relative volume, including  
 12 manual segmentation relative volume lesion/lung, predicted segmentation relative volume lesion/lung,  
 13 relative error of lesion/lung relative volume (%) and absolute relative error of lesion/lung relative  
 14 volume (%).

1 Figure 7 presents heatmap of the mean relative error of first-order and histogram shape radiomic  
 2 features in the lung and lesions for different validation sets. Most radiomic features exhibited a mean  
 3 relative error less than 5% with the highest mean relative error for the lung being -6.95% for Range  
 4 first-order feature and least axis length shape feature (8.68%) in lesions. The heatmap of the mean  
 5 absolute relative error is depicted in Supplemental Figure 20.

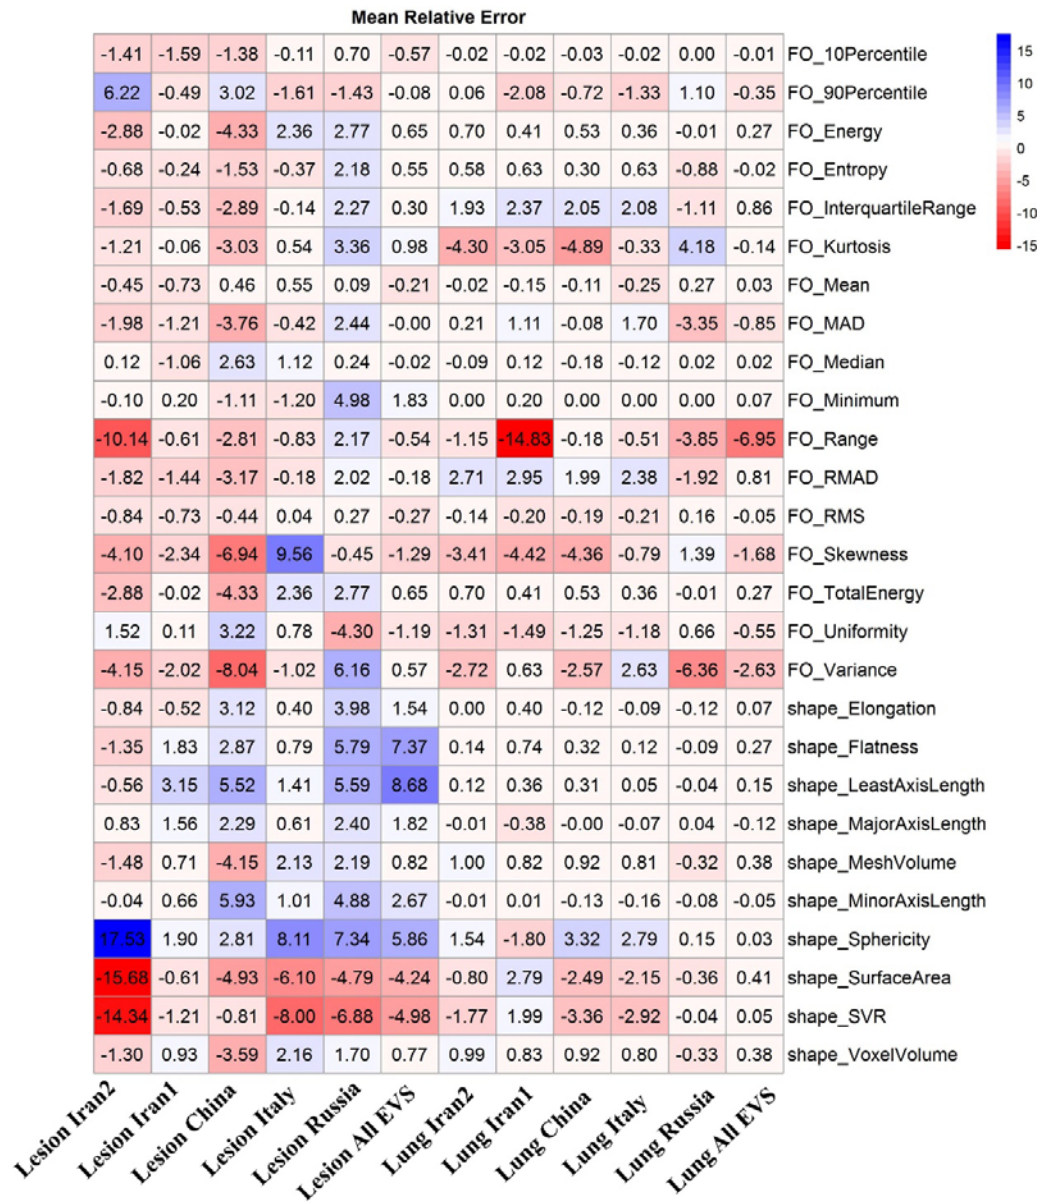

6  
 7 **Figure 7.** Mean relative error of different first-order and shape radiomic features for different datasets  
 8 in lung and infection regions.

9  
 10  
 11

## 1 Discussion

2 Chest CT imaging has emerged as a complementary tool for COVID-19 early diagnosis and  
3 longitudinal follow up (8). However, a number of challenges still need to be addressed for the accurate  
4 diagnosis of COVID-19 and its differentiation from other lung diseases, such as viral and bacterial  
5 pneumonia and other respiratory diseases (18). In this regard, several AI-based solutions exhibiting  
6 different levels of accuracy and robustness were proposed and evaluated (15, 18).

7 Another challenging problem that arises in the domain of quantitative analysis of CT images in  
8 clinical practice is lung and pneumonia infectious lesions segmentation (20). At the outset, different  
9 complex manifestations (appearance, size, location, boundaries and contrast) of infectious lesions,  
10 including consolidation, reticulation, and Ground-Glass Opacity (GGO) at different stages of the  
11 disease (longitudinal changes in the same patients) have been observed (13). Furthermore, providing  
12 ground truth segmentation for infectious lesion segmentation is challenging owing to inter-/intra-  
13 observer variability, noisy annotations, and the long processing time (20).

14 Previously developed atlas (46), rule (47), and hybrid (atlas and rule) (48) based algorithms for  
15 lung segmentation have shown acceptable performance on normal lungs and in the presence of mild  
16 pathogens (low density), such as emphysema (49). However, they presented limited performance in  
17 severe conditions (high density), including pleural effusion, atelectasis, consolidation, fibrosis, and  
18 pneumonia (50). Recent developments in the field of machine learning have led to a renewed interest  
19 in automatic lung segmentation. However, most seminal works in this area used a limited training  
20 dataset, predominantly containing normal cases or focusing on one class of pathogenesis, which could  
21 impact generalizability for unseen/non-diagnosed test datasets (51). In the present study, we applied  
22 deep learning algorithms and transfer learning on CT images obtained from different imaging centers  
23 to detect and segment the whole lung and pneumonia infected regions in COVID-19 patients.

24 A number of works attempted to develop automatic segmentation algorithms for lung and  
25 infectious lesions in COVID-19 CT images. Hofmanninger *et al.* (50) developed models for lung  
26 segmentation and reported a dice of  $0.98 \pm 0.01$  for different pathological states (atelectasis, fibrosis,  
27 mass, pneumothorax, and trauma). They concluded that diversity in the training dataset is more  
28 important than deep learning algorithms. Müller *et al.* (52) implemented a 3D U-Net using data  
29 augmentation for generating image patches during training for lung and lesion segmentation on 20  
30 annotated CT volumes. They achieved Dice coefficients of 0.950 and 0.761 for lung and lesions,  
31 respectively. A modified 3D U-Net (feature variation and progressive atrous spatial pyramid pooling  
32 blocks) proposed by Yan *et al.* (33) was developed for lung and infectious lesion segmentation on 861  
33 patients, reporting a Dice similarity index of 0.987 for lung and 0.726 for lesions segmentation.  
34 Moreover, comparisons were performed with a fully dense Fully Convolutional Network (FCN) (lung:  
35 0.865, lesions: 0.659 ) (53), U-Net (lung: 0.987, lesions: 0.688 ) (54), V-Net (lung: 0.983, lesions:  
36 0.625 ) (55), and U-Net++ (lung: 0.986, lesions: 0.681) (56). The mean Dice for lung and lesions

1 segmentation for different external validation sets used in our work are  $0.98\pm 0.011$  and  $0.91\pm 0.038$ ,  
2 respectively.

3 Chen *et al.* (57) used the residual attention U-Net for multi-class segmentation of CT images,  
4 achieving a Dice of 0.94 for infectious lesions segmentation. Zhou *et al.* (34) used a modified U-net  
5 network through spatial and channel attention mechanisms along with focal Tversky loss in the  
6 training process for improving small lesions segmentation. The results were evaluated on 427 slices  
7 achieving a Dice of 0.83. Elharrouss *et al.* (58) adopted an encoder-decoder for infectious lesions  
8 segmentation and used 20 clinical studies from the Italian Society of Medical and Interventional  
9 Radiology to report a Dice of 0.786. They compared the results with U-Net (Dice: 0.439 ) (59),  
10 Attention-UNet (Dice: 0.583) (60), Gated-UNet (Dice: 0.623) (61), Dense-UNet (Dice: 0.515) (62), U-  
11 Net++ (Dice: 0.422) (56) and Inf-Net (Dice: 0.739) (32). Wang *et al.* (63) proposed a robust algorithm  
12 for COVID-19 infectious lesions segmentation from CT images (COPLE-Net) designed to learn from  
13 noisy labeled data. The algorithm relies on noise-robust Dice loss and mean absolute error loss for  
14 generalized Dice loss for robust segmentation of noisy datasets and a modified version of U-Net to  
15 better handle infectious lesion segmentation with various manifestations and scales. The best results  
16 achieved by COPLE-Net were  $0.807\pm 0.099$  and  $0.160\pm 0.171\%$  as Dice coefficient and relative  
17 volume error (RVE (in %)) respectively. Wang *et al.* (63) evaluated different deep learning algorithms,  
18 including modified 3D U-Net (3D New-Net U-Net, Dice:  $0.704\pm 0.187$ , RVE:  $25.41\pm 24.73\%$ ) (64),  
19 modified 2D U-Net (2D New-Net U-Net, Dice:  $0.791\pm 0.129$ , RVE:  $18.37\pm 17.43\%$ ) (64), spatial  
20 attention gate U-Net (Attention U-Net, Dice:  $0.772\pm 0.123$ , RVE:  $19.77\pm 18.41\%$ ) (60), spatial and  
21 channel ‘squeeze and excitation’ blocks with U-net ( ScSE U-Net, dice:  $0.780\pm 0.125$  , RVE:  
22  $18.85\pm 16.69\%$ ) (65), and light-weight power efficient and general purpose CNN (ESPNetv2, Dice:  
23  $0.698\pm 0.148$ , RVE:  $23.69\pm 20.26\%$ ) (66). Our proposed COLI-Net showed good performance  
24 compared to previous studies with a a Dice of  $0.91\pm 0.038$  (95% CI: 0.90 - 0.91) and RVE of  $0.38 \pm$   
25  $1.2\%$  (95% CI: 0.16 - 0.59) for pneumonia infectious lesions.

26 A large labeled dataset is required to build a robust and generalizable model and avoid overfitting.  
27 Previous studies attempted to transfer the knowledge from natural to medical imaging domain, leading  
28 to improved accuracy by addressing the issue of limited datasets (36, 37). Transfer learning was  
29 recently applied for the detection and classification of COVID-19 using chest x-ray and CT images  
30 (67, 68). More recently, Wang *et al.* (69) applied four transfer learning methods on COVID-19 CT  
31 images for the segmentation of infectious lesions using 3D U-Net. The information was transformed  
32 from cancer and pleural effusion data to COVID-19 lesion segmentation, the Dice coefficient  
33 increased from  $0.673\pm 0.22$  to  $0.703\pm 0.20$  after transfer learning (69). They concluded that the  
34 transferability of non-COVID-19 data improved the quality of COVID-19 lesion segmentation to build  
35 a robust segmentation model. In our study, we exploited transfer learning from a large multicentric

1 lung labeled dataset with various pathologies to overcome the shortcomings of infectious lesion  
2 segmentation.

3 Li *et al.* (70) used thick-section chest CT images of 531 COVID-19 patients for automatic  
4 segmentation of lesions using 2.5D U-net to achieve Dice coefficients of  $0.74 \pm 0.28$  and  $0.76 \pm 0.29$   
5 with respect to manual delineation performed by two radiologists. The inter-observer variability  
6 measured by the Dice metric was  $0.79 \pm 0.25$  between two radiologists. They calculated two imaging  
7 biomarkers, including the percentage of infection and average infectious HU for severity and  
8 progression assessment, resulting in AUC of 0.97. Thick-section CT imaging were recommended for  
9 high-pitch scans to decrease the acquisition time and motion artifacts (due to breath-holding) and  
10 reduce radiation doses to patients (10, 71). In our dataset, various slice thicknesses (1-8 mm) have  
11 been included to train a robust network against this parameter, which highly impacts image  
12 manifestation. The relative error of volume difference for percentage of infectious (lesion/lung) and  
13 relative mean HU Diff (%) were  $0.22 \pm 6.3\%$  (95% CI: -0.95 - 1.4%) and  $-0.18 \pm 3.4\%$  (95% CI: -0.8 -  
14 0.44%), demonstrating the high accuracy of COLI-Net for biomarker generation.

15 Potential foreseen applications are not limited to the detection and segmentation but could be useful  
16 in providing diagnostic and prognostic parameters calculated using lung and infections segmentation  
17 to estimate the percentage of infections, and enabling advanced image processing in COVID-19  
18 patients. The existing body of research on pneumonia suggests that the pneumonia severity index (PSI)  
19 can potentially be used as a severity marker (72). A recent study classified COVID-19 patients into  
20 severe and non-severe patients based on PSI calculated using CT images (73). Different deep learning  
21 algorithms and radiomics analysis approaches using CT images have been examined recently for  
22 developing diagnostic (discriminating COVID-19 from bacterial/viral pneumonia) and prognostic  
23 (survival, hospital stay, intensive care unit (ICU) admission, risk of outcome) models, which require  
24 lung and lesion segmentation (18). Moreover, calculating the percentage of infection and well-aerated  
25 regions in the lung are frequently performed through visual assessment or by simply calculating HU  
26 values in the lungs, which is not only time-consuming but also lacks accuracy.

27 The established model exhibited noticeable performance variation across different COVID-19  
28 patients collected from different countries, centers, with different patient backgrounds, and stages of  
29 the disease. Since the quality of CT images depends directly on the scanner model, imaging protocol  
30 (tube voltage, tube current, pitch factor, etc), and reconstruction algorithm, we employed various  
31 datasets from different centers to cover a large variability (10, 71). Though the proposed algorithm was  
32 evaluated using a multi-center, multi-scanner, multi-national dataset and patients with a diverse  
33 background, stages of the disease, a full-scale adaptation of this model requires further clinical  
34 investigation and fine-tuning to the specific image acquisition parameters of a center. This framework  
35 provides multiple imaging biomarkers for COVID-19 patients to facilitate the assessment of their  
36 clinical relevance in diagnostic (discriminating COVID-19 from bacterial/viral pneumonia) and



1 prognostic (survival, hospital stay, ICU admission, risk of outcome) applications. Further development  
2 should involve implementing lung lobes segmentation to calculate all potential imaging biomarkers at  
3 the lobes level.

4

5

## 6 **Conclusion**

7 We set out to develop an automated algorithm capable of segmenting three-dimensional whole lung  
8 and infected regions in COVID-19 patients from chest CT images using deep learning techniques to  
9 enable fast, consistent, robust, and human error immune framework for lung and pneumonia lesion  
10 detection and delineation. Owing to the complex nature of the problem and high variability in lesion  
11 manifestation, transfer learning from whole lungs to pneumonia infection lesions was proposed and  
12 implemented to enrich specific COVID-19 pneumonia features identification from clinical studies.  
13 Moreover, a multi-centric and multi-scanner dataset was collected for the development of the deep  
14 learning model to establish an automated and generalizable platform for efficient COVID-19 patients  
15 management. The developed artificial intelligence model was evaluated using a wide range of  
16 COVID-19 patients of diverse populations with different stages of the disease from multiple centers  
17 around the world to enable big data analysis of COVID-19 for automated progression/regression  
18 assessment of pneumonia lesions in follow-up studies, provide diagnostic and prognostic metrics, and  
19 enable further advanced image processing.

20

21

22

23

24

25

26

27

28

29

30

31

1 **Acknowledgments**

2 This work was supported by the Swiss National Science Foundation under grant SNRF  
3 320030\_176052.

4

5 **Disclosure**

6 The authors have no conflict of interest to disclose.

7

8

## 1 References

- 2 1. Zhu N, Zhang D, Wang W, et al. A novel coronavirus from patients with pneumonia in China,  
3 2019. *N Engl J Med*. 2020;382(8):727-33.
- 4 2. Wu Z, McGoogan JM. Characteristics of and important lessons from the coronavirus disease  
5 2019 (COVID-19) outbreak in China: Summary of a report of 72314 cases from the Chinese  
6 Center for Disease Control and Prevention. *JAMA*. 2020;323(13):1239-42.
- 7 3. Nicola M, Alsaifi Z, Sohrabi C, et al. The socio-economic implications of the coronavirus  
8 pandemic (COVID-19): A review. *Int J Surg*. 2020;78:185-93.
- 9 4. Le TT, Andreadakis Z, Kumar A, et al. The COVID-19 vaccine development landscape. *Nat Rev*  
10 *Drug Discov*. 2020;19(5):305-6.
- 11 5. Sanders JM, Monogue ML, Jodlowski TZ, Cutrell JB. Pharmacologic treatments for  
12 coronavirus disease 2019 (COVID-19): a review. *Jama*. 2020;323(18):1824-36.
- 13 6. Fang Y, Zhang H, Xie J, et al. Sensitivity of chest CT for COVID-19: comparison to RT-PCR.  
14 *Radiology*. 2020:200432.
- 15 7. Yang W, Yan F. Patients with RT-PCR-confirmed COVID-19 and normal chest CT. *Radiology*.  
16 2020;295(2):E3-E.
- 17 8. Ai T, Yang Z, Hou H, et al. Correlation of chest CT and RT-PCR testing in coronavirus disease  
18 2019 (COVID-19) in China: a report of 1014 cases. *Radiology*. 2020:200642.
- 19 9. Bai HX, Hsieh B, Xiong Z, et al. Performance of radiologists in differentiating COVID-19 from  
20 viral pneumonia on chest CT. *Radiology*. 2020.
- 21 10. Shiri I, Akhavanallaf A, Sanaat A, et al. Ultra-low-dose chest CT imaging of COVID-19 patients  
22 using a deep residual neural network. *Eur Radiol*. 2020:*in press*.
- 23 11. De Smet K, De Smet D, Ryckaert T, et al. Diagnostic Performance of Chest CT for SARS-CoV-2  
24 Infection in Individuals with or without COVID-19 Symptoms. *Radiology*. 2020:202708.
- 25 12. Wang S, Zha Y, Li W, et al. A fully automatic deep learning system for COVID-19 diagnostic  
26 and prognostic analysis. *European Respiratory Journal*. 2020.
- 27 13. Lessmann N, Sánchez CI, Beenen L, et al. Automated Assessment of CO-RADS and Chest CT  
28 Severity Scores in Patients with Suspected COVID-19 Using Artificial Intelligence. *Radiology*.  
29 2020:202439.
- 30 14. Shiri I, Sorouri M, Geramifar P, et al. Machine learning-based prognostic modeling using  
31 clinical data and quantitative radiomic features from chest CT images in COVID-19 patients.  
32 *Comput Biol Med*. 2021;132:104304.
- 33 15. Wu Q, Wang S, Li L, et al. Radiomics Analysis of Computed Tomography helps predict poor  
34 prognostic outcome in COVID-19. *Theranostics*. 2020;10(16):7231.
- 35 16. Shoeibi A, Khodatars M, Alizadehsani R, et al. Automated detection and forecasting of covid-  
36 19 using deep learning techniques: A review. *arXiv preprint arXiv:2007.10785*. 2020.
- 37 17. Wynants L, Van Calster B, Bonten MM, et al. Prediction models for diagnosis and prognosis of  
38 covid-19 infection: systematic review and critical appraisal. *bmj*. 2020;369.
- 39 18. Mei X, Lee H-C, Diao K-y, et al. Artificial intelligence-enabled rapid diagnosis of patients with  
40 COVID-19. *Nature Medicine*. 2020:1-5.
- 41 19. Zhang K, Liu X, Shen J, et al. Clinically applicable AI system for accurate diagnosis,  
42 quantitative measurements, and prognosis of covid-19 pneumonia using computed  
43 tomography. *Cell*. 2020.
- 44 20. Shi F, Wang J, Shi J, et al. Review of artificial intelligence techniques in imaging data  
45 acquisition, segmentation and diagnosis for covid-19. *IEEE reviews in biomedical engineering*.  
46 2020.
- 47 21. Chaganti S, Grenier P, Balachandran A, et al. Automated Quantification of CT Patterns  
48 Associated with COVID-19 from Chest CT. *Radiology: Artificial Intelligence*.  
49 2020;2(4):e200048.

- 1 22. Satapathy SC, Hemanth DJ, Kadry S, et al. Segmentation and Evaluation of COVID-19 Lesion  
2 from CT scan Slices-A Study with Kapur/Otsu Function and Cuckoo Search Algorithm. 2020.
- 3 23. Anwar SM, Majid M, Qayyum A, et al. Medical Image Analysis using Convolutional Neural  
4 Networks: A Review. *Journal of Medical Systems*. 2018;42(11):226.
- 5 24. Hesamian MH, Jia W, He X, Kennedy P. Deep learning techniques for medical image  
6 segmentation: Achievements and challenges. *Journal of digital imaging*. 2019;32(4):582-96.
- 7 25. Shiri I, Arabi H, Geramifar P, et al. Deep-JASC: joint attenuation and scatter correction in  
8 whole-body 18 F-FDG PET using a deep residual network. *European Journal of Nuclear  
9 Medicine and Molecular Imaging*. 2020.
- 10 26. Shiri I, Sabet KA, Arabi H, et al. Standard SPECT myocardial perfusion estimation from half-  
11 time acquisitions using deep convolutional residual neural networks. *Journal of nuclear  
12 cardiology: official publication of the American Society of Nuclear Cardiology*. 2020.
- 13 27. Arabi H, Zaidi H. Applications of artificial intelligence and deep learning in molecular imaging  
14 and radiotherapy. *European Journal of Hybrid Imaging*. 2020;4(1):17.
- 15 28. Akhavanallaf A, Shiri I, Arabi H, Zaidi H. Whole-body voxel-based internal dosimetry using  
16 deep learning. *European Journal of Nuclear Medicine and Molecular Imaging*. 2020.
- 17 29. Arabi H, AkhavanAllaf A, Sanaat A, et al. The promise of artificial intelligence and deep  
18 learning in PET and SPECT imaging. *Phys Med*. 2021;83:122-37.
- 19 30. Sanaat A, Shiri I, Arabi H, et al. Deep learning-assisted ultra-fast/low-dose whole-body  
20 PET/CT imaging. *Eur J Nucl Med Mol Imaging*. 2021.
- 21 31. Wang X, Deng X, Fu Q, et al. A Weakly-Supervised Framework for COVID-19 Classification and  
22 Lesion Localization From Chest CT. *IEEE Transactions on Medical Imaging*. 2020;39(8):2615-  
23 25.
- 24 32. Fan DP, Zhou T, Ji GP, et al. Inf-Net: Automatic COVID-19 Lung Infection Segmentation From  
25 CT Images. *IEEE Trans Med Imaging*. 2020;39(8):2626-37.
- 26 33. Yan Q, Wang B, Gong D, et al. COVID-19 Chest CT Image Segmentation--A Deep Convolutional  
27 Neural Network Solution. *arXiv preprint arXiv:2004.10987*. 2020.
- 28 34. Zhou T, Canu S, Ruan S. An automatic COVID-19 CT segmentation network using spatial and  
29 channel attention mechanism. *arXiv*. 2020.
- 30 35. Cho J, Lee K, Shin E, et al. How much data is needed to train a medical image deep learning  
31 system to achieve necessary high accuracy? *arXiv preprint arXiv:1511.06348*. 2015.
- 32 36. Zhang L, Wang X, Yang D, et al. Generalizing deep learning for medical image segmentation  
33 to unseen domains via deep stacked transformation. *IEEE Transactions on Medical Imaging*.  
34 2020.
- 35 37. Chen S, Ma K, Zheng Y. Med3d: Transfer learning for 3d medical image analysis. *arXiv  
36 preprint arXiv:1904.00625*. 2019.
- 37 38. Kiser KJ, Ahmed S, Stieb S, et al. PleThora: Pleural effusion and thoracic cavity segmentations  
38 in diseased lungs for benchmarking chest CT processing pipelines. *Medical physics*. 2020.
- 39 39. Clark K, Vendt B, Smith K, et al. The Cancer Imaging Archive (TCIA): maintaining and  
40 operating a public information repository. *Journal of digital imaging*. 2013;26(6):1045-57.
- 41 40. Aerts H, Velazquez ER, Leijenaar RT, et al. Data from NSCLC-radiomics. The cancer imaging  
42 archive. 2015.
- 43 41. Morozov S, Andreychenko A, Pavlov N, et al. MosMedData: Chest CT Scans With COVID-19  
44 Related Findings Dataset. *arXiv preprint arXiv:2005.06465*. 2020.
- 45 42. Li W, Wang G, Fidon L, et al. On the compactness, efficiency, and representation of 3D  
46 convolutional networks: brain parcellation as a pretext task. *International conference on  
47 information processing in medical imaging*, 2017. Springer: 348-60.
- 48 43. Gibson E, Li W, Sudre C, et al. NiftyNet: a deep-learning platform for medical imaging.  
49 *Computer methods and programs in biomedicine*. 2018;158:113-22.
- 50 44. Ma J, Wang Y, An X, et al. Towards efficient covid-19 ct annotation: A benchmark for lung and  
51 infection segmentation. *arXiv preprint arXiv:2004.12537*. 2020.

- 1 45. Jun M, Cheng G, Yixin W, et al. COVID-19 CT Lung and Infection Segmentation Dataset.  
2 Zenodo, Apr. 2020;20.
- 3 46. Sluimer I, Prokop M, Van Ginneken B. Toward automated segmentation of the pathological  
4 lung in CT. *IEEE transactions on medical imaging*. 2005;24(8):1025-38.
- 5 47. Pulagam AR, Kande GB, Ede VKR, Inampudi RB. Automated lung segmentation from HRCT  
6 scans with diffuse parenchymal lung diseases. *Journal of digital imaging*. 2016;29(4):507-19.
- 7 48. Wang J, Li F, Li Q. Automated segmentation of lungs with severe interstitial lung disease in  
8 CT. *Medical physics*. 2009;36(10):4592-9.
- 9 49. Chen H, Mukundan R, Butler A. Automatic lung segmentation in HRCT images. 2011.
- 10 50. Hofmanninger J, Prayer F, Pan J, et al. Automatic lung segmentation in routine imaging is  
11 primarily a data diversity problem, not a methodology problem. *European Radiology*  
12 *Experimental*. 2020;4(1):50.
- 13 51. Yang J, Veeraraghavan H, Armato III SG, et al. Autosegmentation for thoracic radiation  
14 treatment planning: A grand challenge at AAPM 2017. *Medical physics*. 2018;45(10):4568-81.
- 15 52. Müller D, Rey IS, Kramer F. Automated Chest CT Image Segmentation of COVID-19 Lung  
16 Infection based on 3D U-Net. *arXiv preprint arXiv:2007.04774*. 2020.
- 17 53. Yang B, Zhang W. FD-FCN: 3D Fully Dense and Fully Convolutional Network for Semantic  
18 Segmentation of Brain Anatomy. *arXiv preprint arXiv:1907.09194*. 2019.
- 19 54. Çiçek Ö, Abdulkadir A, Lienkamp SS, et al. 3D U-Net: learning dense volumetric segmentation  
20 from sparse annotation. *International conference on medical image computing and*  
21 *computer-assisted intervention*, 2016. Springer: 424-32.
- 22 55. Milletari F, Navab N, Ahmadi S-A. V-net: Fully convolutional neural networks for volumetric  
23 medical image segmentation. 2016 fourth international conference on 3D vision (3DV), 2016.  
24 *IEEE*: 565-71.
- 25 56. Zhou Z, Siddiquee MMR, Tajbakhsh N, Liang J. U-net++: A nested u-net architecture for  
26 medical image segmentation. *Deep Learning in Medical Image Analysis and Multimodal*  
27 *Learning for Clinical Decision Support*: Springer; 2018:3-11.
- 28 57. Chen X, Yao L, Zhang Y. Residual Attention U-Net for Automated Multi-Class Segmentation of  
29 COVID-19 Chest CT Images. *arXiv preprint arXiv:2004.05645*. 2020.
- 30 58. Elharrouss O, Subramanian N, Al-Maadeed S. An encoder-decoder-based method for COVID-  
31 19 lung infection segmentation. *arXiv preprint arXiv:2007.00861*. 2020.
- 32 59. Ronneberger O, Fischer P, Brox T. U-net: Convolutional networks for biomedical image  
33 segmentation. *International Conference on Medical image computing and computer-assisted*  
34 *intervention*, 2015. Springer: 234-41.
- 35 60. Oktay O, Schlemper J, Folgoc LL, et al. Attention u-net: Learning where to look for the  
36 pancreas. *arXiv preprint arXiv:1804.03999*. 2018.
- 37 61. Schlemper J, Oktay O, Schaap M, et al. Attention gated networks: Learning to leverage salient  
38 regions in medical images. *Medical image analysis*. 2019;53:197-207.
- 39 62. Li X, Chen H, Qi X, et al. H-DenseUNet: hybrid densely connected UNet for liver and tumor  
40 segmentation from CT volumes. *IEEE transactions on medical imaging*. 2018;37(12):2663-74.
- 41 63. Wang G, Liu X, Li C, et al. A Noise-Robust Framework for Automatic Segmentation of COVID-  
42 19 Pneumonia Lesions From CT Images. *IEEE Transactions on Medical Imaging*.  
43 2020;39(8):2653-63.
- 44 64. Isensee F, Kickingereder P, Wick W, et al. No new-net. *International MICCAI Brainlesion*  
45 *Workshop*, 2018. Springer: 234-44.
- 46 65. Roy AG, Navab N, Wachinger C. Recalibrating fully convolutional networks with spatial and  
47 channel “squeeze and excitation” blocks. *IEEE transactions on medical imaging*.  
48 2018;38(2):540-9.
- 49 66. Mehta S, Rastegari M, Shapiro L, Hajishirzi H. Espnetv2: A light-weight, power efficient, and  
50 general purpose convolutional neural network. *Proceedings of the IEEE conference on*  
51 *computer vision and pattern recognition*, 2019. 9190-200.

- 1 67. Jaiswal A, Gianchandani N, Singh D, et al. Classification of the COVID-19 infected patients  
2 using DenseNet201 based deep transfer learning. *Journal of Biomolecular Structure and*  
3 *Dynamics*. 2020:1-8.
- 4 68. Ko H, Chung H, Kang WS, et al. COVID-19 Pneumonia Diagnosis Using a Simple 2D Deep  
5 Learning Framework With a Single Chest CT Image: Model Development and Validation.  
6 *Journal of Medical Internet Research*. 2020;22(6):e19569.
- 7 69. Wang Y, Zhang Y, Liu Y, et al. Does Non-COVID19 Lung Lesion Help? Investigating  
8 Transferability in COVID-19 CT Image Segmentation. *arXiv preprint arXiv:2006.13877*. 2020.
- 9 70. Li Z, Zhong Z, Li Y, et al. From Community Acquired Pneumonia to COVID-19: A Deep Learning  
10 Based Method for Quantitative Analysis of COVID-19 on thick-section CT Scans. *medRxiv*.  
11 2020.
- 12 71. Kalra MK, Homayounieh F, Arru C, et al. Chest CT practice and protocols for COVID-19 from  
13 radiation dose management perspective. *European Radiology*. 2020:1-7.
- 14 72. Fine MJ, Auble TE, Yealy DM, et al. A prediction rule to identify low-risk patients with  
15 community-acquired pneumonia. *New England journal of medicine*. 1997;336(4):243-50.
- 16 73. Shan F, Gao Y, Wang J, et al. Lung infection quantification of covid-19 in ct images with deep  
17 learning. *arXiv preprint arXiv:2003.04655*. 2020.

18

# Supplemental Data

Number of true positive (TP), Number of false positive (FP), Number of false negative (FN), FN Number of true negative (FN) , predicted segmentation (P), Manual segmentation (G)

### 1. Dice Similarity Coefficient

$$DSC = \frac{2 \times TP}{FP \times FN \times (2 \times TP)}$$

### 2. Jaccard Index

$$JI = \frac{TP}{TP + FP + FN}$$

### 3. False Negative

$$FNR = \frac{FN}{FN + TP}$$

### 4. False Positive

$$FPR = \frac{FP}{TN + FP}$$

### 5. Mean Surface Distance

$d(p, G)$ = distance between a point  $p$  belonging to the surface of a 3D surface predicted image (P) and its closest distance (MSD) between the two surfaces P and G can be defined as follows:

$$MSD = \frac{1}{|P|} \iint_{p \in P}^{\infty} d(p, G) dP$$

Where  $|P|$  denotes the surface area of P.

### 6. Mean Harsdorf Distance

$$MHD(P, G) = \frac{1}{P} \max_{p \in P} \{\min_{g \in G} \{d(p, g)\}\}$$

### 7. Releive Difference Percentage

$$RD = \frac{P - G}{G} \times 100$$

### 8. Absolute difference Percentage

$$AD = \left| \frac{P - G}{G} \right| \times 100$$



# Supplemental Figures

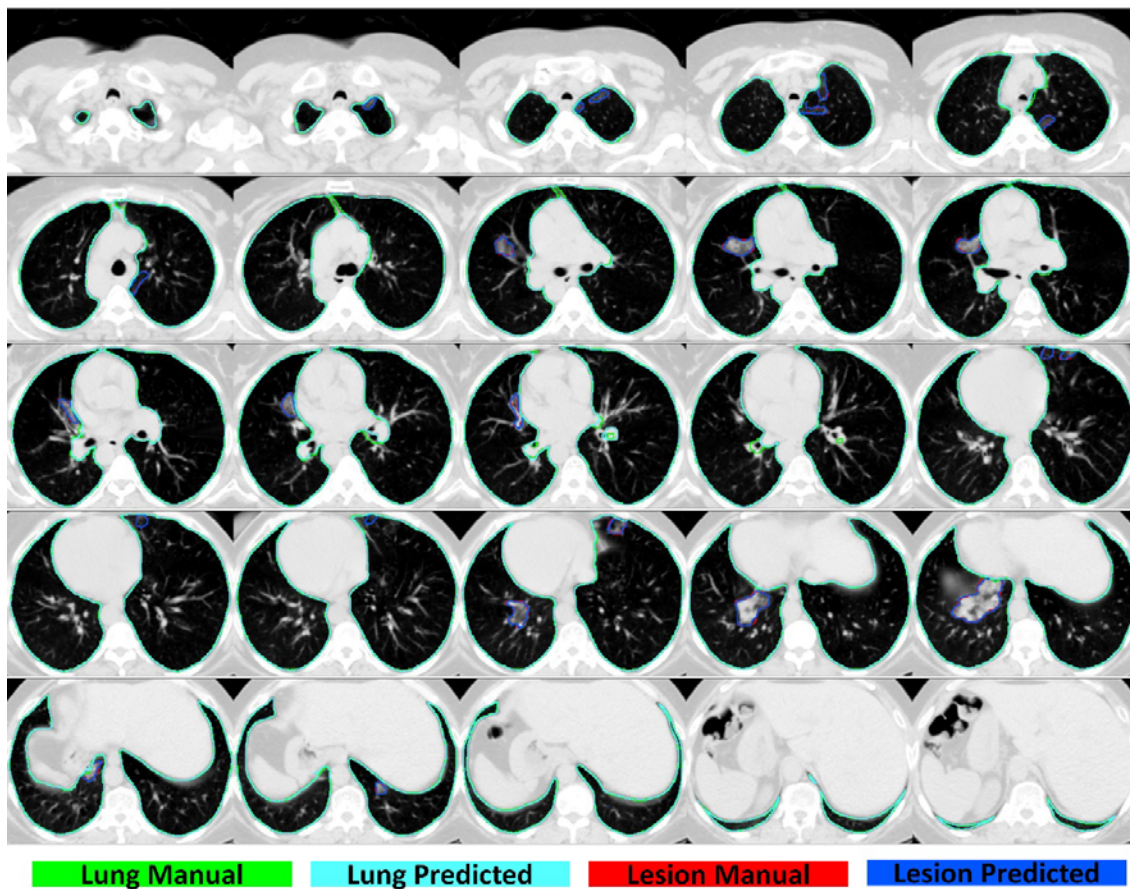

**Supplemental figure 1:** 2D view of different slices of lung and lesion manual/predicted segmentation in Iran1 center, case 1.

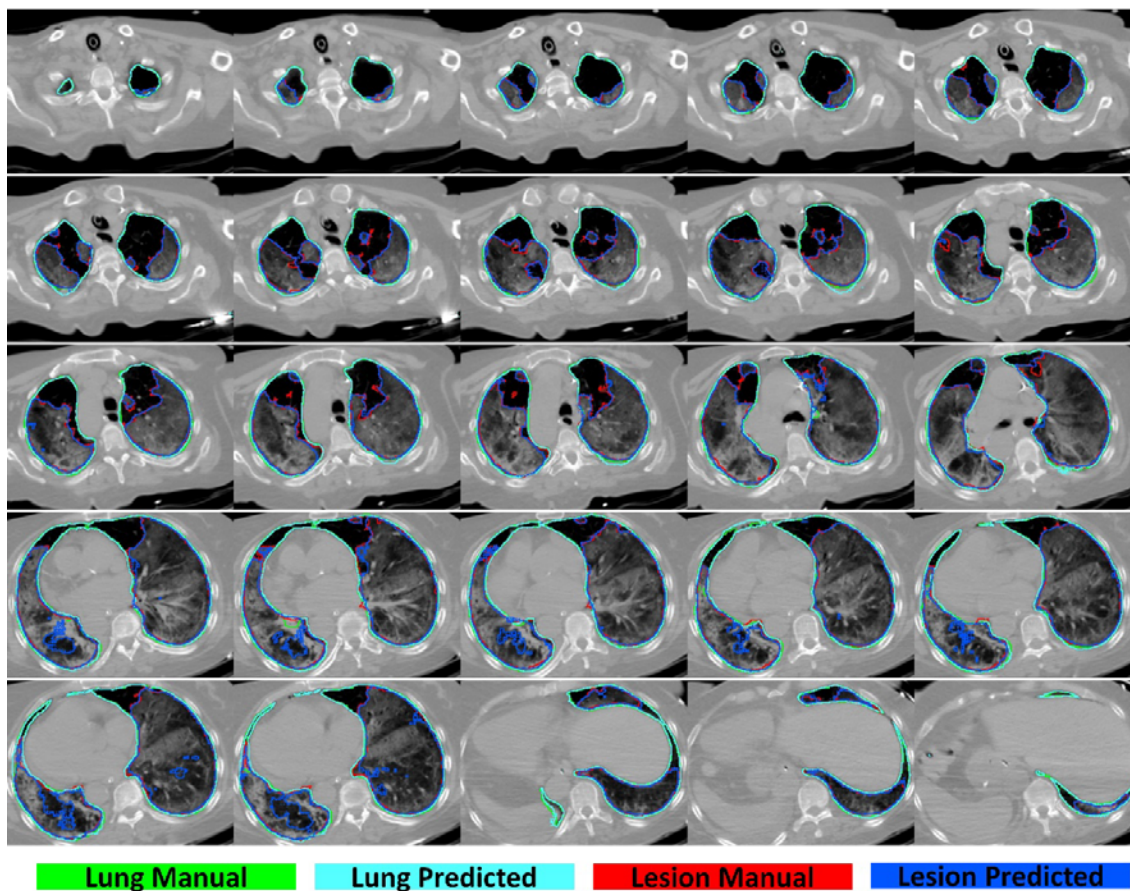

**Supplemental figure 2:** 2D view of different slices of lung and lesion manual/predicted segmentation in Iran1 center, case 2.

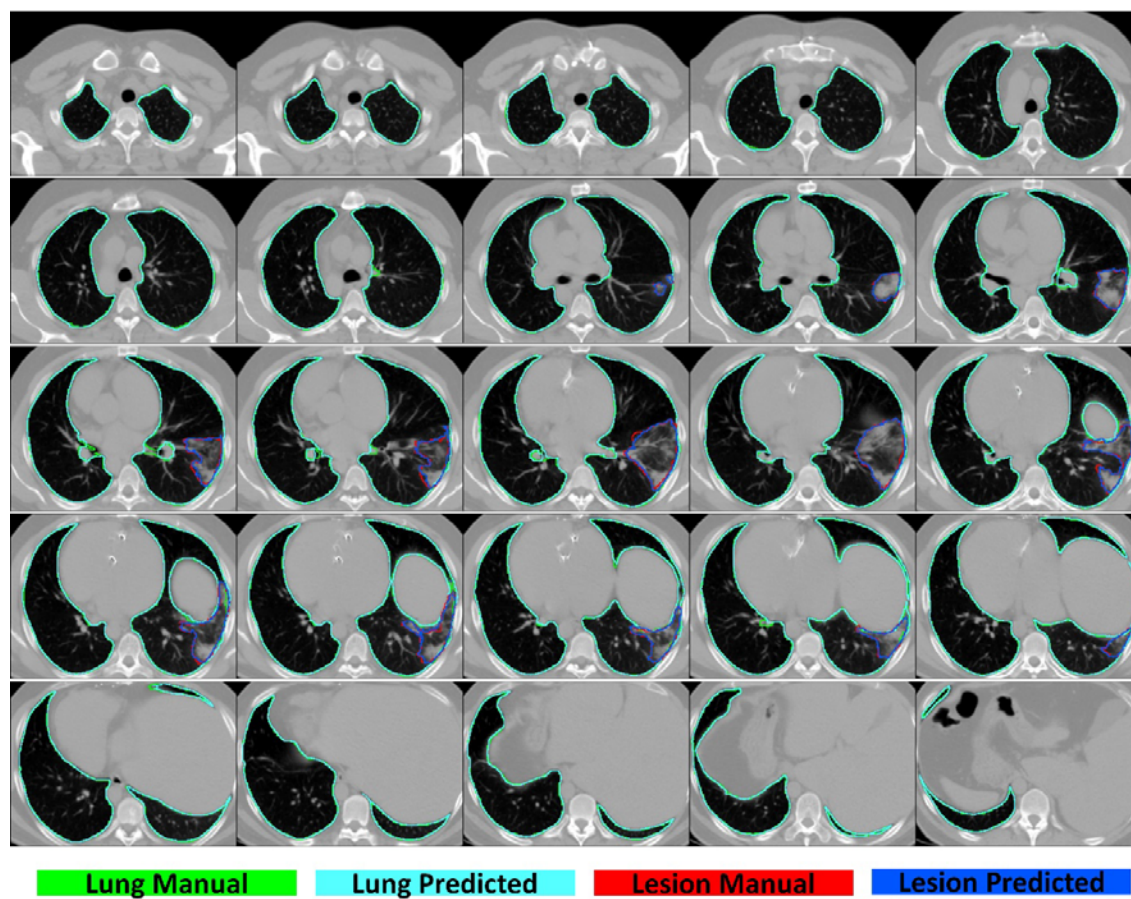

**Supplemental figure 3:** 2D view of different slices of lung and lesion manual/predicted segmentation in Iran1 center, case 3.

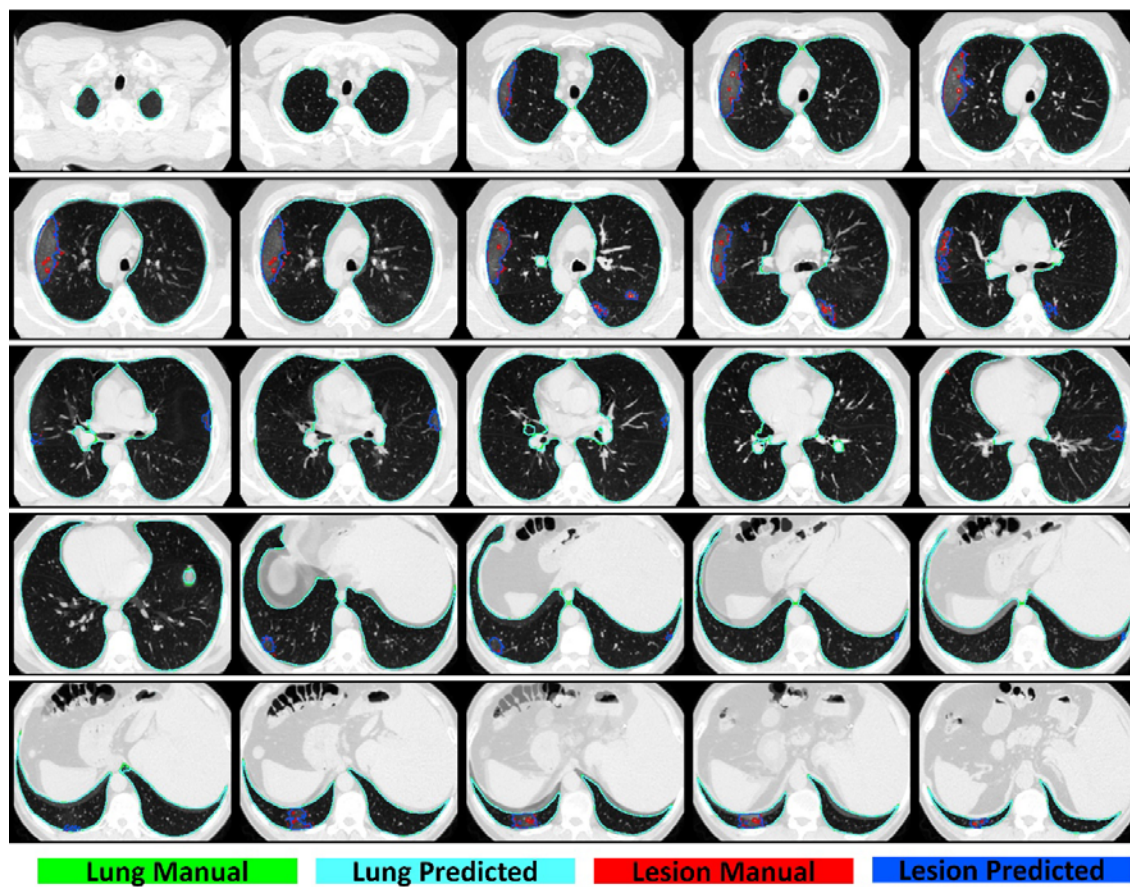

**Supplemental figure 4:** 2D view of different slices of lung and lesion manual/predicted segmentation in Russia center, case 1.

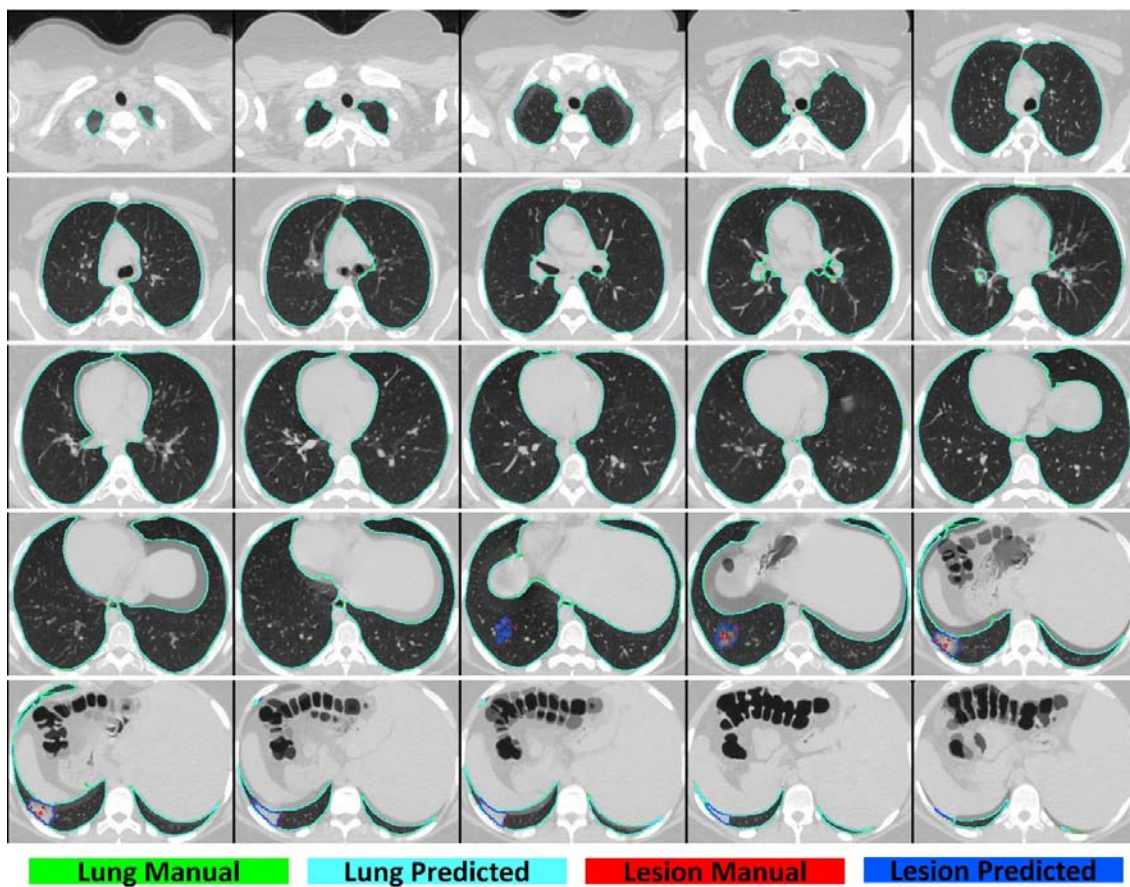

**Supplemental figure 5:** 2D view of different slices of lung and lesion manual/predicted segmentation in Russia center, case 2.

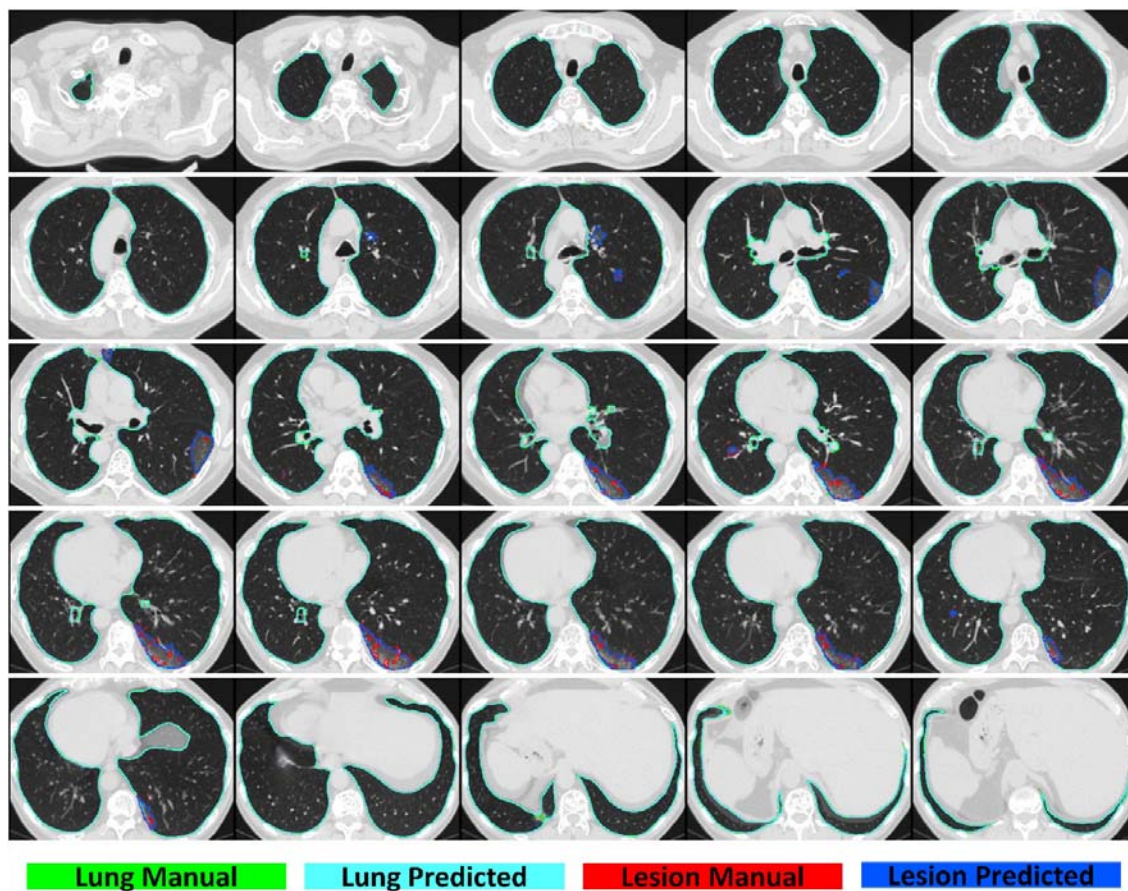

**Supplemental figure 6:** 2D view of different slices of lung and lesion manual/predicted segmentation in Russia center, case 3.

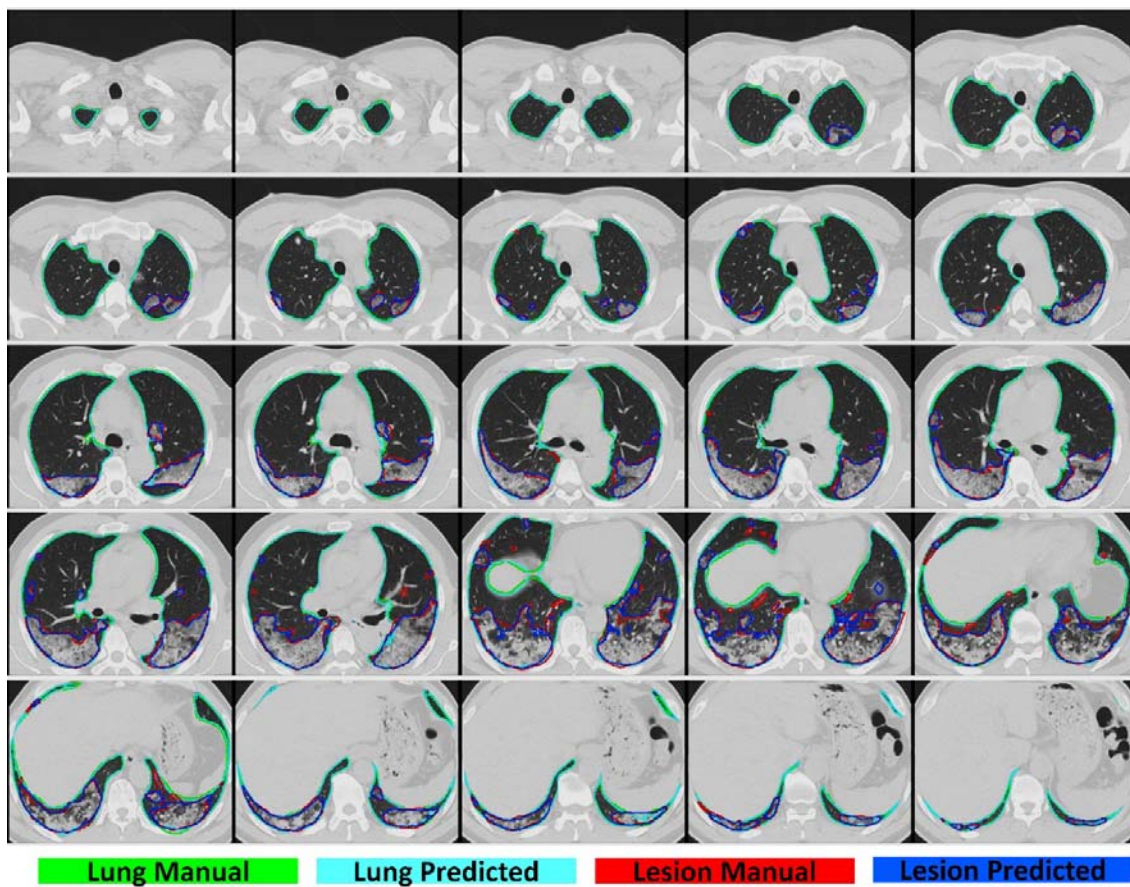

**Supplemental figure 7:** 2D view of different slices of lung and lesion manual/predicted segmentation in Iran2 center, case 1.



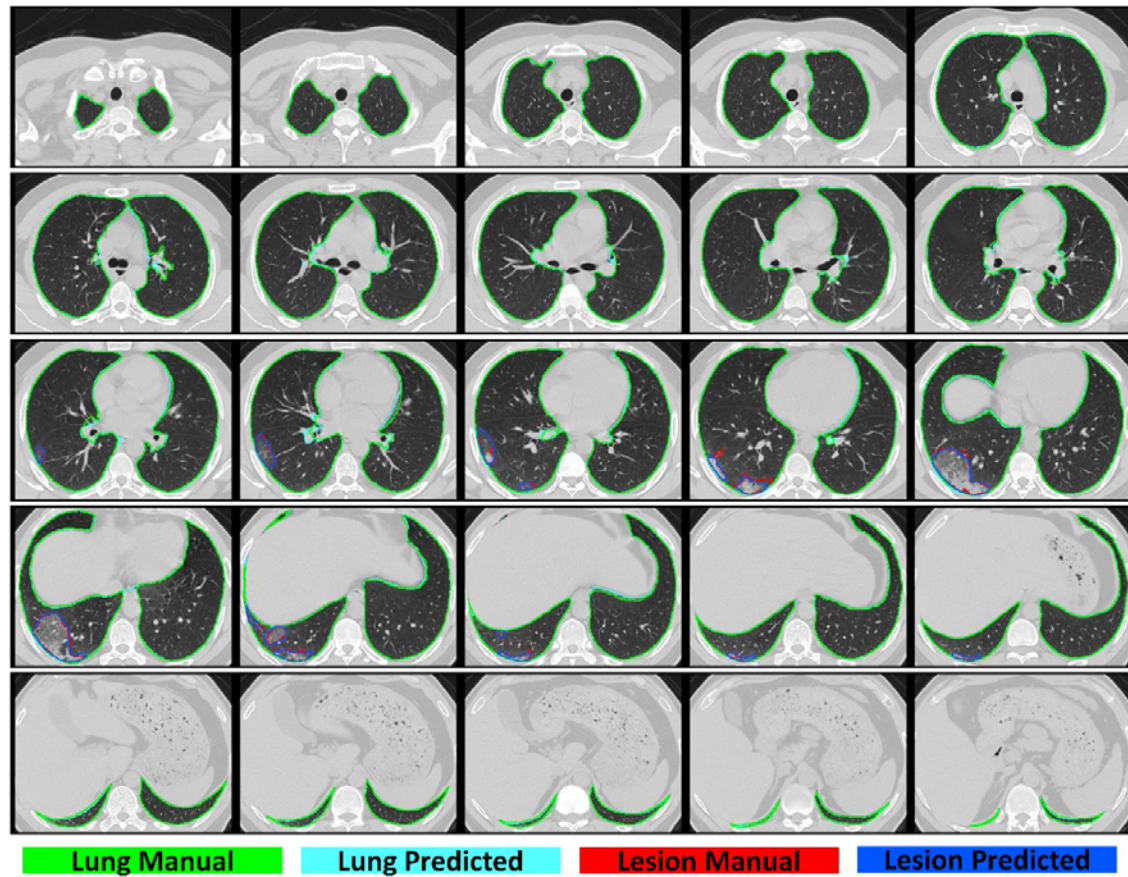

**Supplemental figure 8:** 2D view of different slices of lung and lesion manual/predicted segmentation in Iran2 center, case 2.

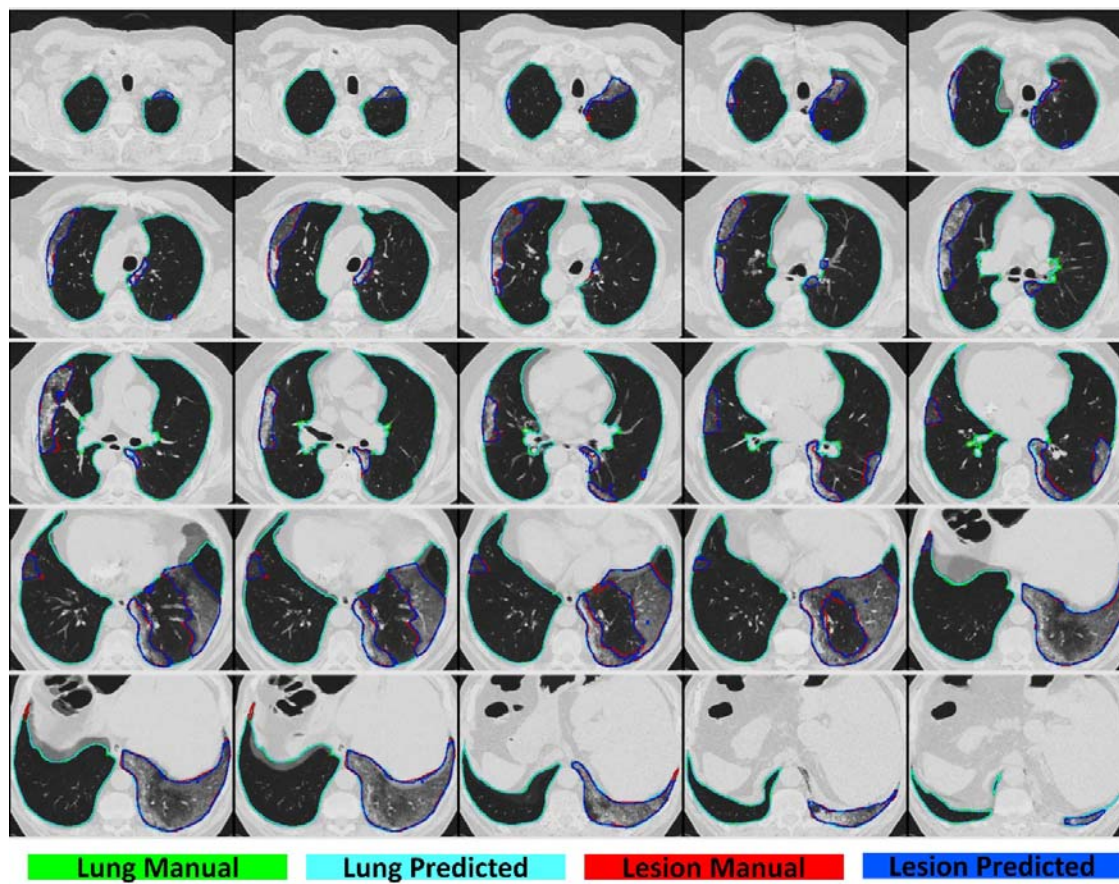

**Supplemental figure 9:** 2D view of different slices of lung and lesion manual/predicted segmentation in China center, case 1.

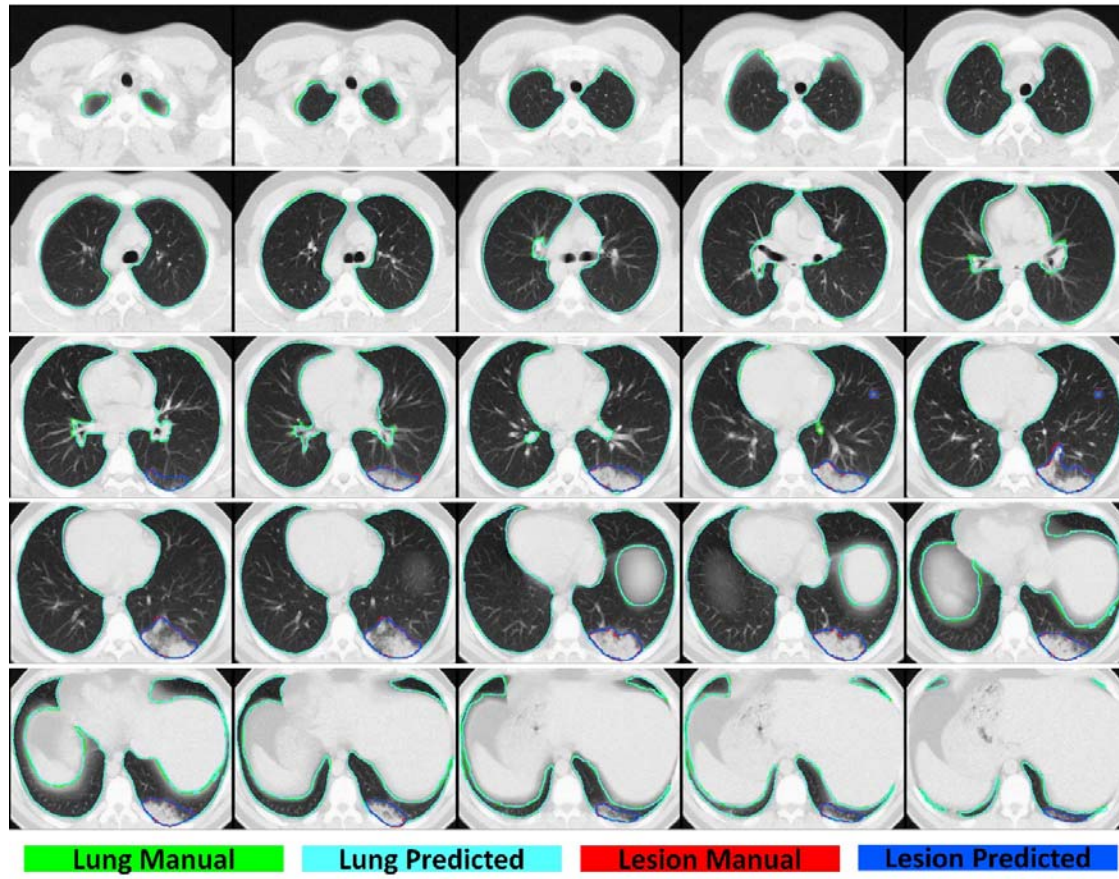

**Supplemental figure 10:** 2D view of different slices of lung and lesion manual/predicted segmentation in China center, case 2.

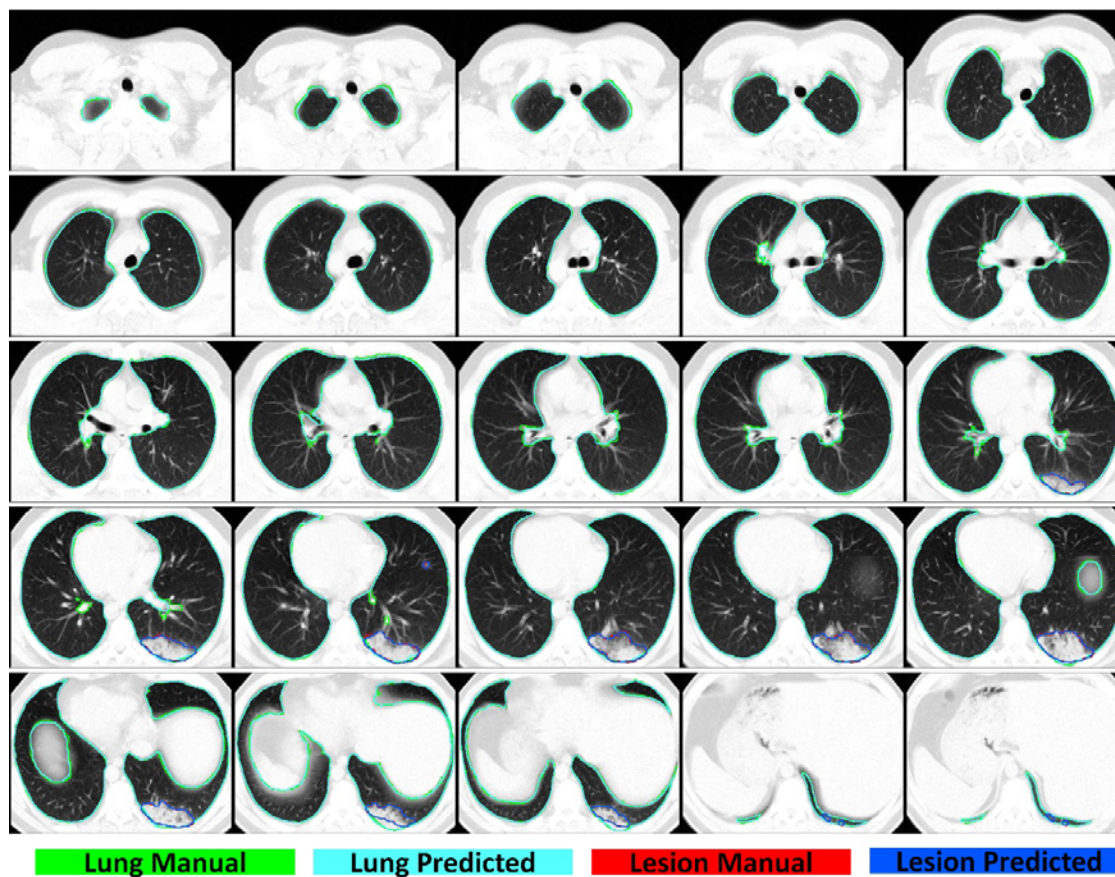

**Supplemental figure 11:** 2D view of different slices of lung and lesion manual/predicted segmentation in Italy center, case 1.

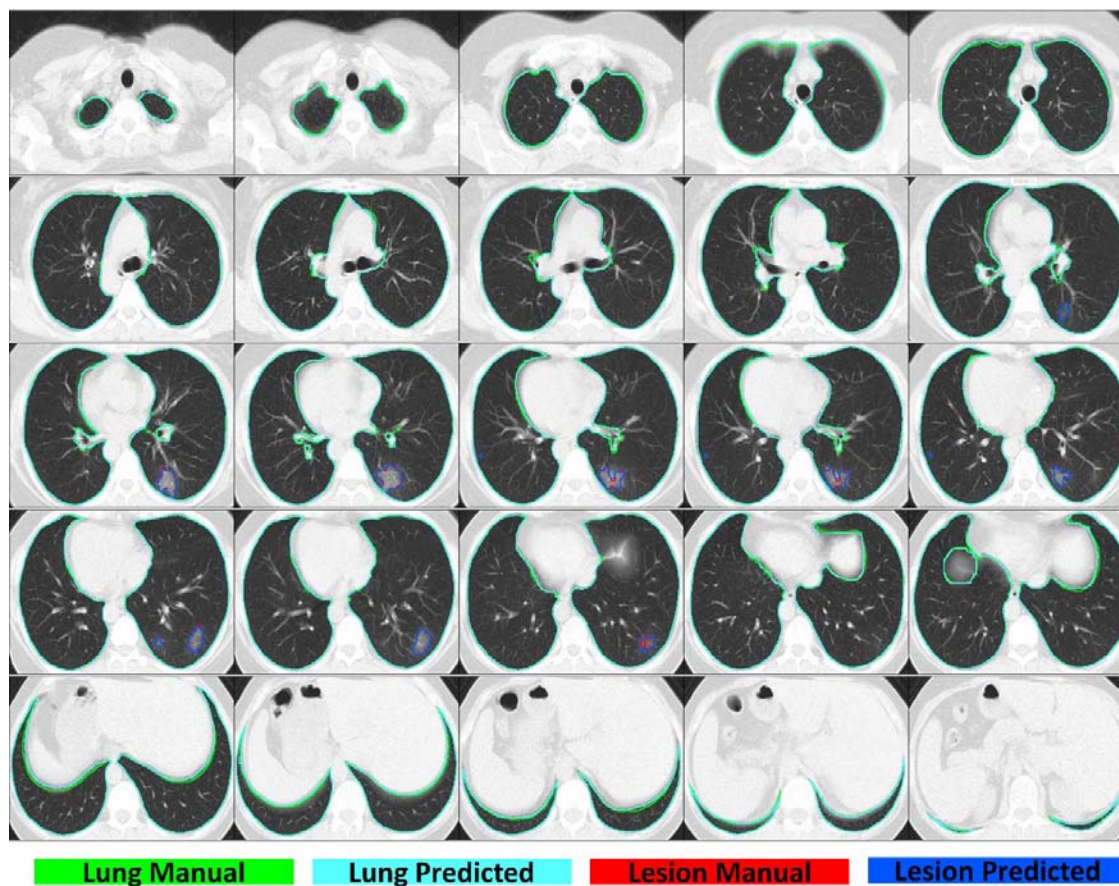

**Supplemental figure 12:** 2D view of different slices of lung and lesion manual/predicted segmentation in Italy center, case 2.

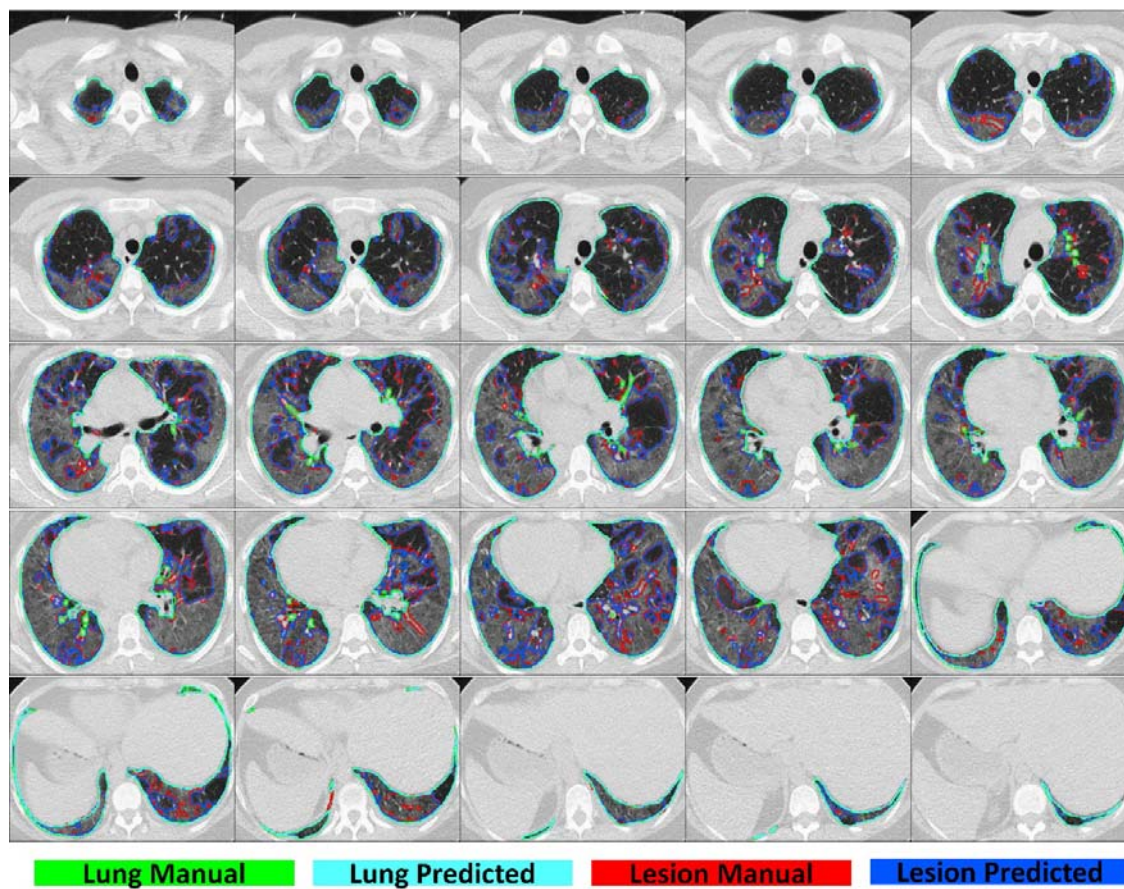

**Supplemental figure 13:** 2D view of different slices of lung and lesion manual/predicted segmentation in Italy center, case 3.

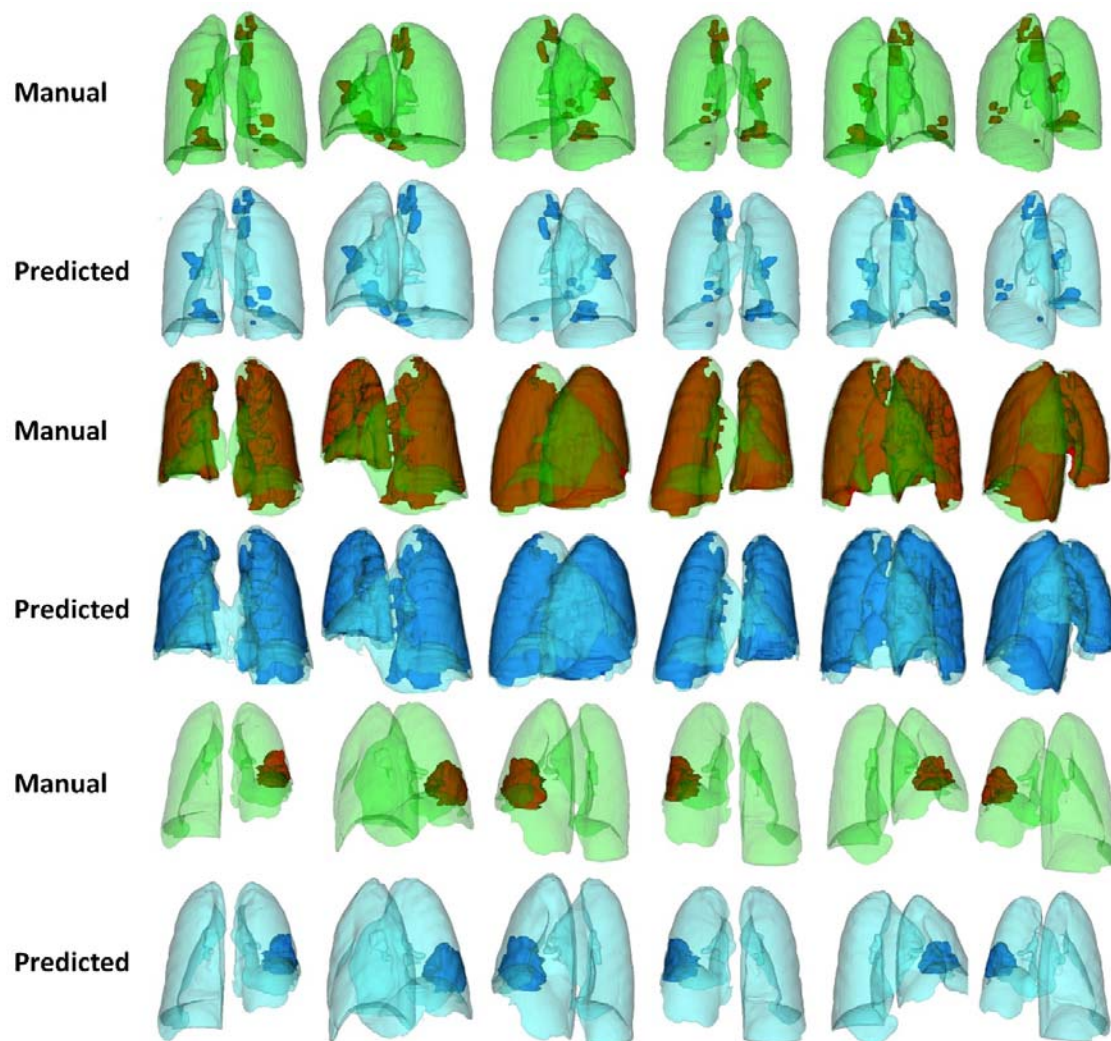

**Supplemental figure 14:** Manual and predicted segmentation 3D view for lung and lesion.

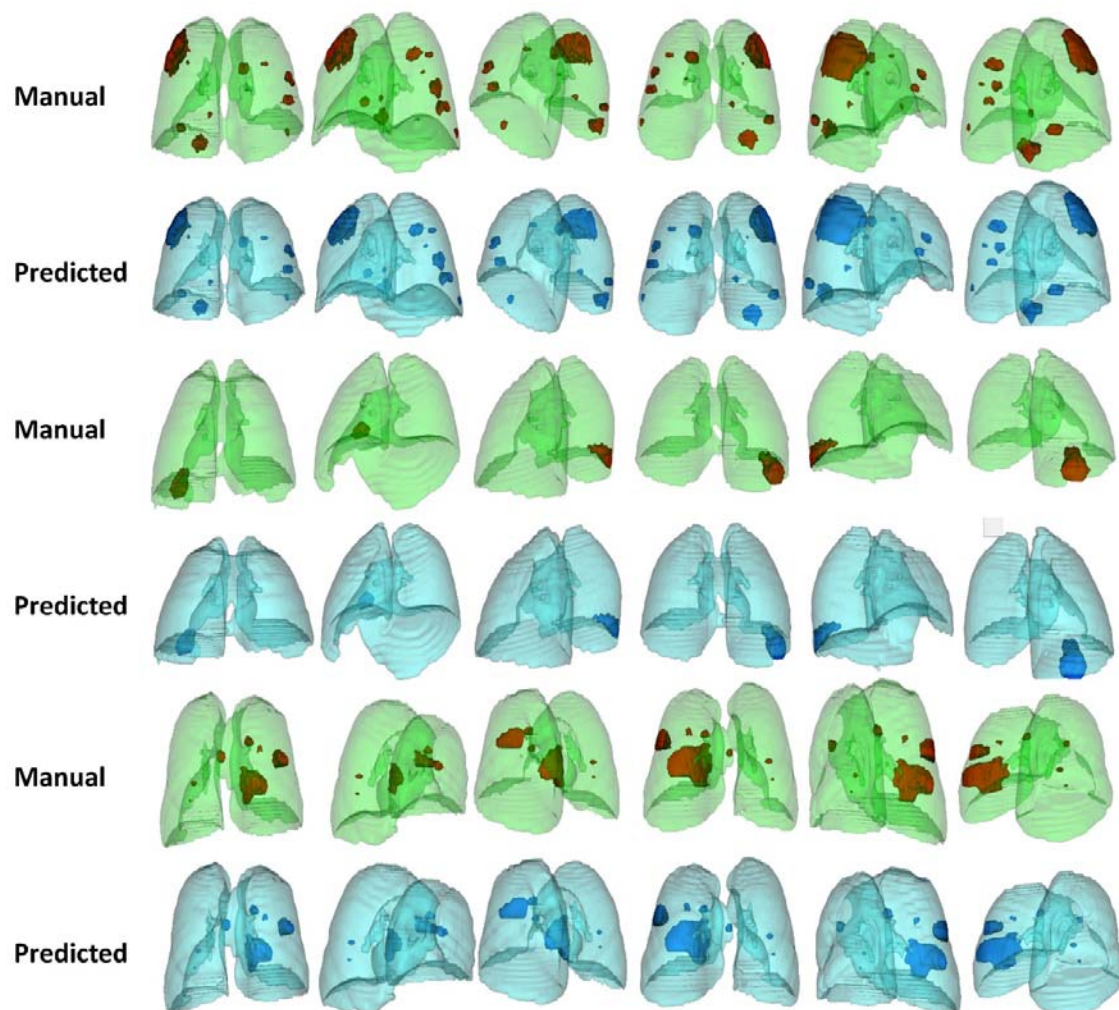

**Supplemental figure 15:** Manual and predicted segmentation 3D view for lung and lesion.



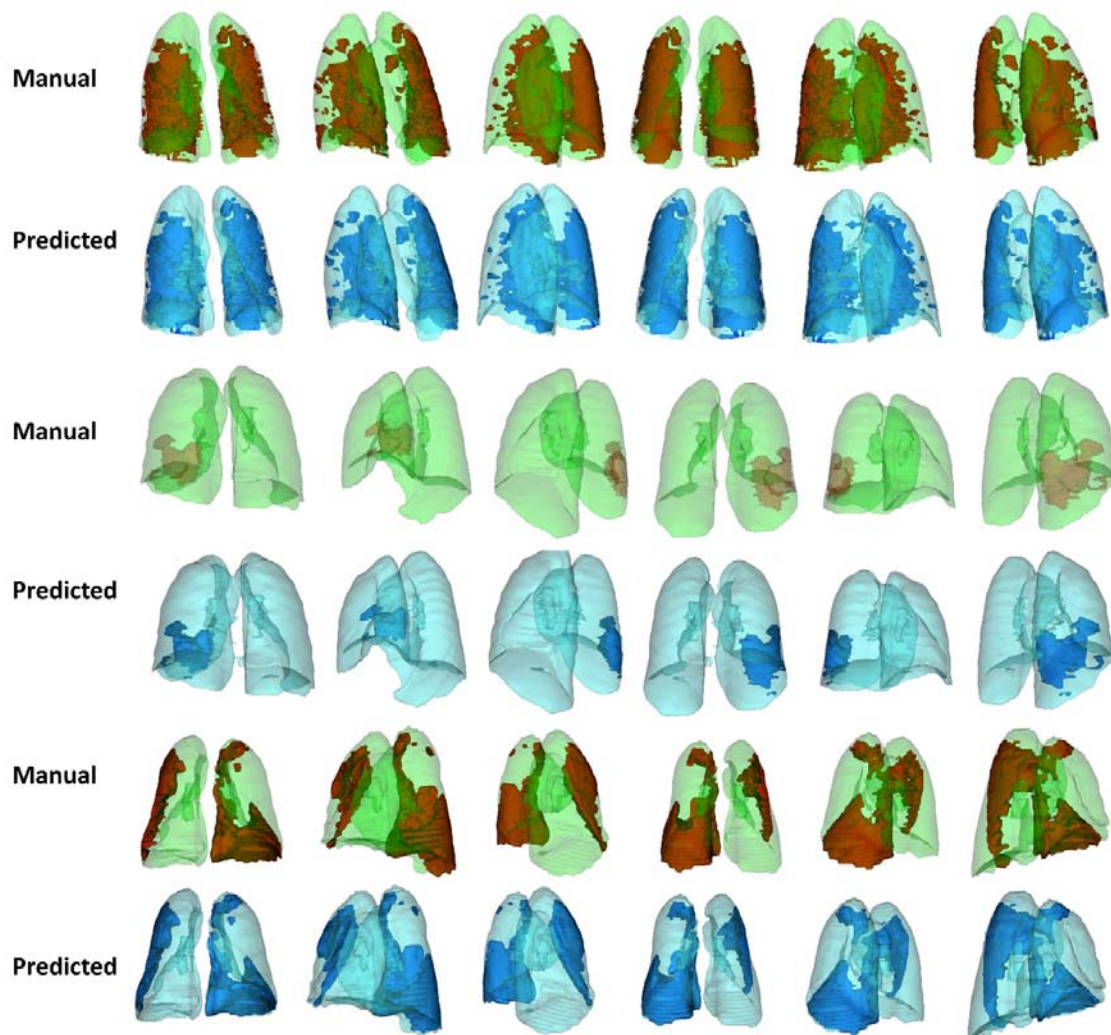

**Supplemental figure 16:** Manual and predicted segmentation 3D view for lung and lesion.

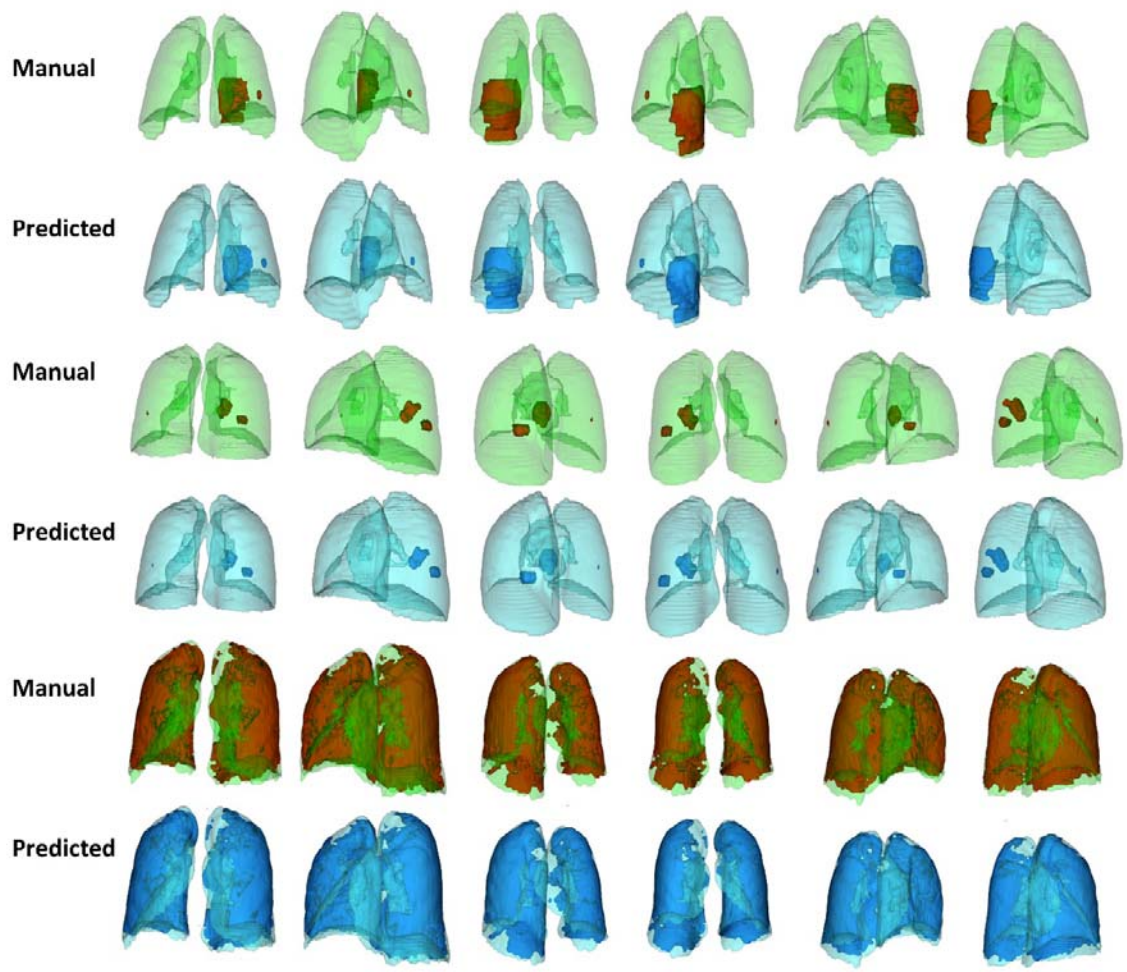

**Supplemental figure 17:** Manual and predicted segmentation 3D view for lung and lesion.

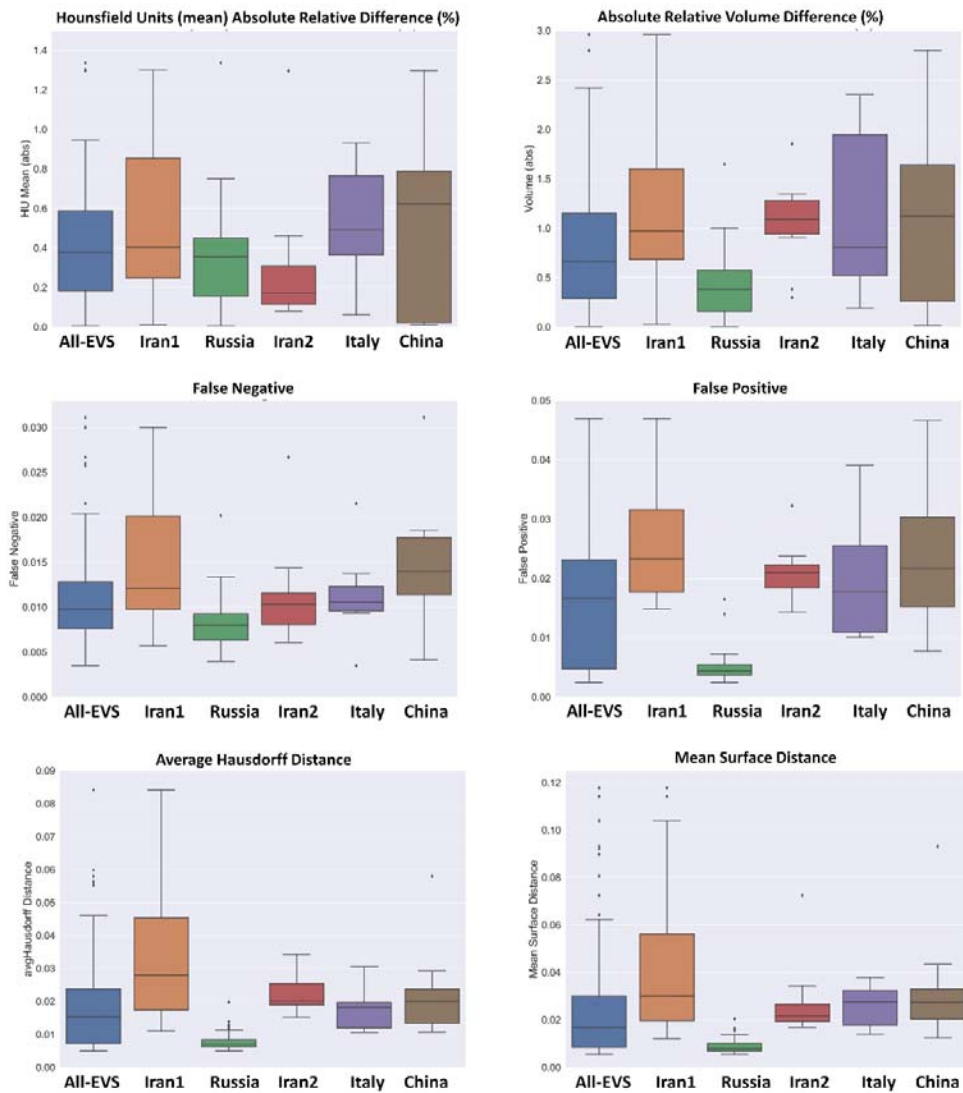

**Supplemental figure 18:** Box plots comparing various quantitative imaging metrics for lung segmentation, including Hounsfield unit(mean) absolute relative difference (%), absolute relative volume difference (%), false negative, false positive, average hausdorff distance and mean surface distance

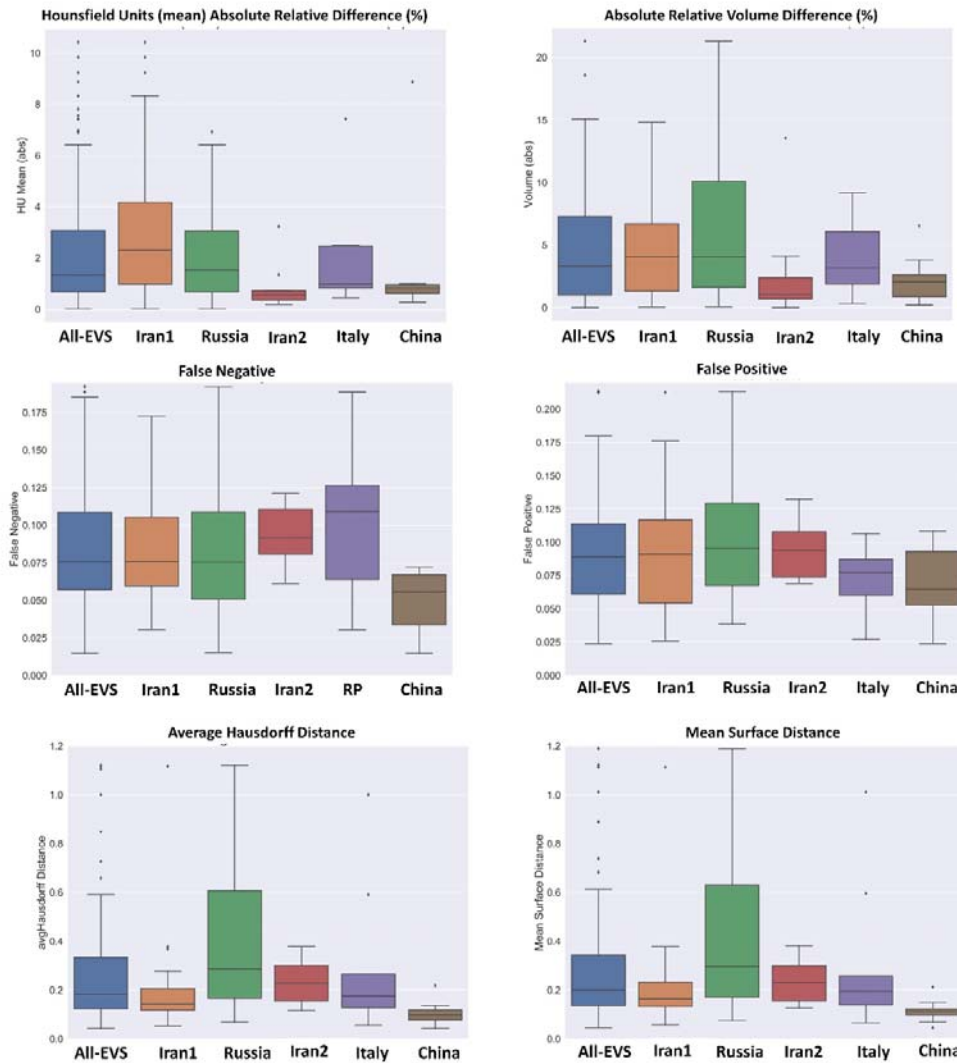

**Supplemental figure 19:** Box plots comparing various quantitative imaging metrics for infectious lesion segmentation, including Hounsfield unit(mean) absolute relative difference (%), absolute relative volume difference (%), false negative, false positive, average hausdorff distance and mean surface distance

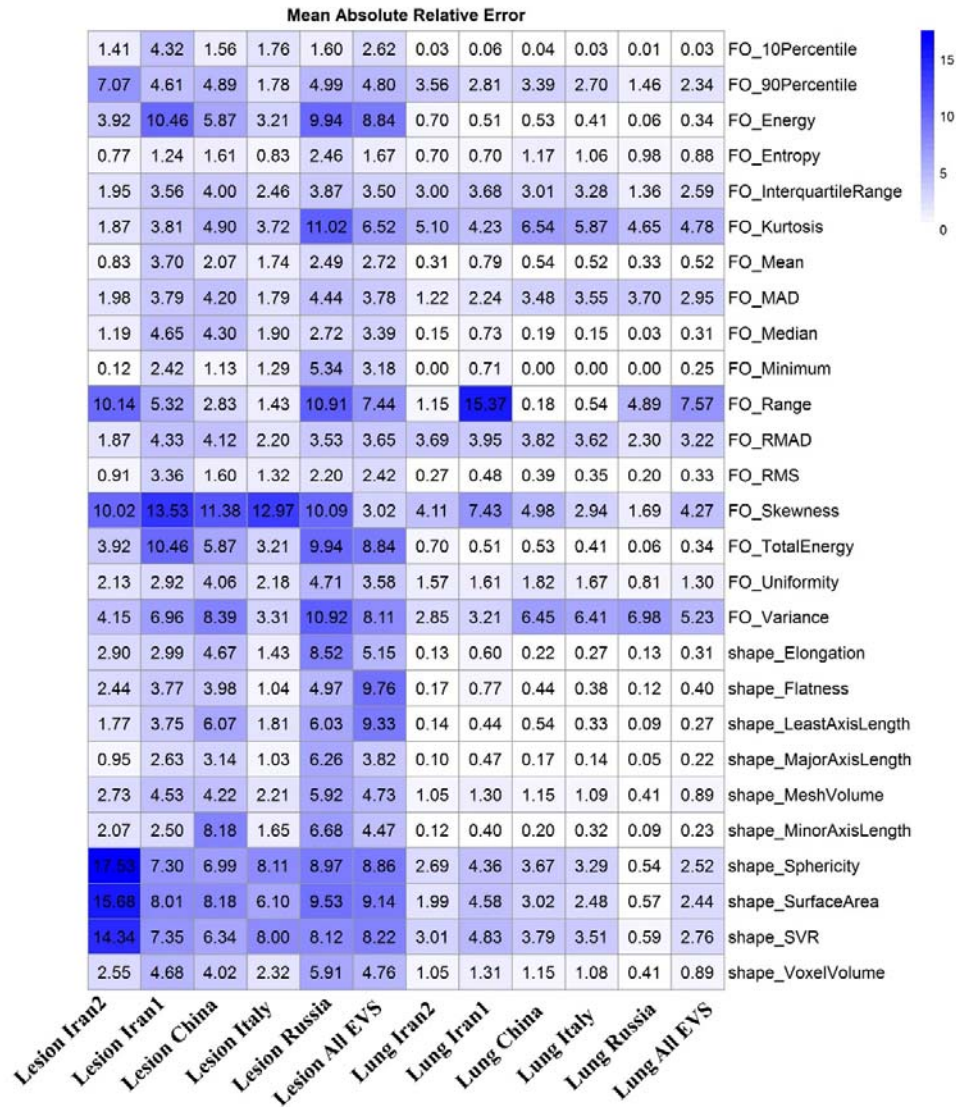

**Supplemental figure 20: Figure 7:** Mean absolute relative error of different first order (FO) and shape radiomics features for different datasets in lung and infection regions.

# Supplemental Tables

---

First Order Statistics (FO)

Formula

---

|                                           |                                                                                                                                                                                             |
|-------------------------------------------|---------------------------------------------------------------------------------------------------------------------------------------------------------------------------------------------|
| 1. Energy                                 | $energy = \sum_{i=1}^{N_p} (\mathbf{X}(i) + c)^2$                                                                                                                                           |
| 2. Total Energy                           | $total\ energy = V_{voxel} \sum_{i=1}^{N_p} (\mathbf{X}(i) + c)^2$                                                                                                                          |
| 3. Entropy                                | $entropy = - \sum_{i=1}^{N_g} p(i) \log_2(p(i) + \delta)$                                                                                                                                   |
| 4. Minimum                                | $minimum = \min(\mathbf{X})$                                                                                                                                                                |
| 5. 10 <sup>th</sup> percentile            | The 10 <sup>th</sup> percentile of $\mathbf{X}$                                                                                                                                             |
| 6. 90 <sup>th</sup> percentile            | The 90 <sup>th</sup> percentile of $\mathbf{X}$                                                                                                                                             |
| 7. Mean                                   | $mean = \frac{1}{N_p} \sum_{i=1}^{N_p} \mathbf{X}(i)$                                                                                                                                       |
| 8. Median                                 | The median gray level intensity within the ROI.                                                                                                                                             |
| 9. Interquartile Range                    | $interquartile\ range = \mathbf{P}_{75} - \mathbf{P}_{25}$                                                                                                                                  |
| 10. Range                                 | $range = \max(\mathbf{X}) - \min(\mathbf{X})$                                                                                                                                               |
| 11. Mean Absolute Deviation (MAD)         | $MAD = \frac{1}{N_p} \sum_{i=1}^{N_p}  \mathbf{X}(i) - \bar{X} $                                                                                                                            |
| 12. Robust Mean Absolute Deviation (RMAD) | $rMAD = \frac{1}{N_{10-90}} \sum_{i=1}^{N_{10-90}}  \mathbf{X}_{10-90}(i) - \bar{X}_{10-90} $                                                                                               |
| 13. Root Mean Squared (RMS)               | $RMS = \sqrt{\frac{1}{N_p} \sum_{i=1}^{N_p} (\mathbf{X}(i) + c)^2}$                                                                                                                         |
| 14. Skewness                              | $skewness = \frac{\mu_3}{\sigma^3} = \frac{\frac{1}{N_p} \sum_{i=1}^{N_p} (\mathbf{X}(i) - \bar{X})^3}{\left( \sqrt{\frac{1}{N_p} \sum_{i=1}^{N_p} (\mathbf{X}(i) - \bar{X})^2} \right)^3}$ |
| 15. Kurtosis                              | $kurtosis = \frac{\mu_4}{\sigma^4} = \frac{\frac{1}{N_p} \sum_{i=1}^{N_p} (\mathbf{X}(i) - \bar{X})^4}{\left( \frac{1}{N_p} \sum_{i=1}^{N_p} (\mathbf{X}(i) - \bar{X})^2 \right)^2}$        |
| 16. Variance                              | $variance = \frac{1}{N_p} \sum_{i=1}^{N_p} (\mathbf{X}(i) - \bar{X})^2$                                                                                                                     |



|                                 |                                                                                                   |
|---------------------------------|---------------------------------------------------------------------------------------------------|
| 17. Uniformity                  | $uniformity = \sum_{i=1}^{N_g} p(i)^2$                                                            |
| <b>Shape</b>                    |                                                                                                   |
| 1. Elongation                   | $Elongation = \sqrt{\frac{\lambda_{minor}}{\lambda_{major}}}$                                     |
| 2. Flatness                     | $Flatness = \sqrt{\frac{\lambda_{least}}{\lambda_{major}}}$                                       |
| 3. Least Axis Length            | $Least\ Axis = 4\sqrt{\lambda_{least}}$                                                           |
| 4. Major Axis Length            | $Major\ Axis = 4\sqrt{\lambda_{major}}$                                                           |
| 5. Minor Axis Length            | $Minor\ Axis = 4\sqrt{\lambda_{minor}}$                                                           |
| 6. Sphericity                   | $Sphericity = \frac{\sqrt[3]{36\pi V^2}}{A}$                                                      |
| 7. Surface Area                 | $A_i = \frac{1}{2}  b_i b_j \times a_i c_i  \quad (1)$<br>$A = \sum_{i=1}^{N_f} A_i \quad (2)$    |
| 8. Surface Area to Volume ratio | $Surface\ to\ Volume\ Ratio = \frac{A}{V}$                                                        |
| 9. Mesh Volume                  | $V_i = \frac{Oa_i \cdot (Ob_i \times Oc_i)}{6} \quad (1)$<br>$V = \sum_{i=1}^{N_f} V_i \quad (2)$ |
| 10. Voxel Volume                | $V_{voxel} = \sum_{k=1}^{N_v} V_k$                                                                |

Table 1: First order and shape radiomics features

Table 2: Descriptive statistics of Dice Coefficient for lung and lesion in different datasets

| <b>Dice Coefficient</b> | <b>Datasets</b> | <b>Min</b> | <b>Max</b> | <b>Mean <math>\pm</math> SD</b> | <b>95% CI</b> |
|-------------------------|-----------------|------------|------------|---------------------------------|---------------|
| <b>Lung</b>             | All EVS         | 0.92       | 0.99       | $0.98 \pm 0.011$                | 0.98 - 0.99   |
|                         | China           | 0.96       | 0.99       | $0.98 \pm 0.0086$               | 0.98 - 0.99   |
|                         | Italy           | 0.97       | 0.99       | $0.98 \pm 0.0051$               | 0.98 - 0.99   |
|                         | Iran2           | 0.97       | 0.99       | $0.98 \pm 0.0046$               | 0.98 - 0.99   |
|                         | Russia          | 0.99       | 0.99       | $0.99 \pm 0.0016$               | 0.99 - 0.99   |
|                         | Iran1           | 0.92       | 0.99       | $0.98 \pm 0.013$                | 0.97 - 0.98   |
| <b>Lesion</b>           | All EVS         | 0.8        | 0.98       | $0.91 \pm 0.038$                | 0.9 - 0.91    |
|                         | Italy           | 0.92       | 0.98       | $0.94 \pm 0.024$                | 0.92 - 0.96   |
|                         | China           | 0.85       | 0.97       | $0.91 \pm 0.04$                 | 0.89 - 0.94   |
|                         | Iran2           | 0.83       | 0.93       | $0.90 \pm 0.031$                | 0.88 - 0.92   |
|                         | Russia          | 0.8        | 0.96       | $0.90 \pm 0.044$                | 0.89 - 0.91   |
|                         | Iran1           | 0.84       | 0.97       | $0.91 \pm 0.03$                 | 0.9 - 0.92    |

Table 3: Descriptive statistics of Jaccard Index for lung and lesion in different datasets

| <b>Jaccard Index</b> | <b>Datasets</b> | <b>Min</b> | <b>Max</b> | <b>Mean <math>\pm</math> SD</b> | <b>95% CI</b> |
|----------------------|-----------------|------------|------------|---------------------------------|---------------|
| <b>Lung</b>          | All EVS         | 0.86       | 0.99       | $0.97 \pm 0.022$                | 0.97 - 0.97   |
|                      | China           | 0.93       | 0.98       | $0.96 \pm 0.016$                | 0.95 - 0.97   |
|                      | Italy           | 0.95       | 0.98       | $0.97 \pm 0.0098$               | 0.96 - 0.98   |
|                      | Iran2           | 0.95       | 0.98       | $0.97 \pm 0.0089$               | 0.96 - 0.97   |
|                      | Russia          | 0.98       | 0.99       | $0.99 \pm 0.0032$               | 0.99 - 0.99   |
|                      | Iran1           | 0.86       | 0.98       | $0.95 \pm 0.025$                | 0.95 - 0.96   |
| <b>Lesion</b>        | All EVS         | 0.66       | 0.96       | $0.83 \pm 0.062$                | 0.82 - 0.84   |
|                      | Italy           | 0.85       | 0.96       | $0.89 \pm 0.043$                | 0.86 - 0.92   |
|                      | China           | 0.74       | 0.94       | $0.84 \pm 0.068$                | 0.8 - 0.89    |
|                      | Iran2           | 0.71       | 0.88       | $0.82 \pm 0.05$                 | 0.79 - 0.85   |
|                      | Russia          | 0.66       | 0.93       | $0.82 \pm 0.071$                | 0.8 - 0.84    |
|                      | Iran1           | 0.73       | 0.94       | $0.84 \pm 0.05$                 | 0.82 - 0.85   |

Table 4: Descriptive statistics of False Negative for lung and lesion in different datasets

| <b>False Negative</b> | <b>Datasets</b> | <b>Min</b> | <b>Max</b> | <b>Mean <math>\pm</math> SD</b> | <b>95% CI</b>  |
|-----------------------|-----------------|------------|------------|---------------------------------|----------------|
| <b>Lung</b>           | All EVS         | 0.0035     | 0.086      | 0.013 $\pm$ 0.011               | 0.011 - 0.015  |
|                       | China           | 0.0041     | 0.031      | 0.015 $\pm$ 0.0074              | 0.0099 - 0.019 |
|                       | Italy           | 0.0035     | 0.022      | 0.011 $\pm$ 0.0048              | 0.0083 - 0.015 |
|                       | Iran2           | 0.006      | 0.027      | 0.011 $\pm$ 0.0059              | 0.0077 - 0.015 |
|                       | Russia          | 0.004      | 0.02       | 0.0082 $\pm$ 0.0027             | 0.0074 - 0.009 |
|                       | Iran1           | 0.0057     | 0.086      | 0.019 $\pm$ 0.017               | 0.014 - 0.024  |
| <b>Lesion</b>         | All EVS         | 0.015      | 0.23       | 0.086 $\pm$ 0.044               | 0.078 - 0.094  |
|                       | Italy           | 0.015      | 0.072      | 0.05 $\pm$ 0.022                | 0.034 - 0.065  |
|                       | China           | 0.03       | 0.19       | 0.1 $\pm$ 0.054                 | 0.068 - 0.14   |
|                       | Iran2           | 0.061      | 0.23       | 0.11 $\pm$ 0.047                | 0.076 - 0.13   |
|                       | Russia          | 0.015      | 0.21       | 0.087 $\pm$ 0.05                | 0.073 - 0.1    |
|                       | Iran1           | 0.031      | 0.17       | 0.084 $\pm$ 0.034               | 0.075 - 0.094  |

Table 5: Descriptive statistics of False Positive for lung and lesion in different datasets

| <b>False Positive</b> |         | <b>Min</b> | <b>Max</b> | <b>Mean <math>\pm</math> SD</b> | <b>95% CI</b>   |
|-----------------------|---------|------------|------------|---------------------------------|-----------------|
| <b>Lung</b>           | All EVS | 0.0025     | 0.073      | 0.017 $\pm$ 0.014               | 0.014 - 0.019   |
|                       | China   | 0.0077     | 0.047      | 0.023 $\pm$ 0.012               | 0.016 - 0.031   |
|                       | Italy   | 0.01       | 0.039      | 0.019 $\pm$ 0.0099              | 0.013 - 0.026   |
|                       | Iran2   | 0.014      | 0.032      | 0.021 $\pm$ 0.0048              | 0.018 - 0.024   |
|                       | Russia  | 0.0025     | 0.016      | 0.0049 $\pm$ 0.0025             | 0.0043 - 0.0056 |
|                       | Iran1   | 0.015      | 0.073      | 0.027 $\pm$ 0.014               | 0.023 - 0.032   |
| <b>Lesion</b>         | All EVS | 0.024      | 0.32       | 0.098 $\pm$ 0.055               | 0.088 - 0.11    |
|                       | China   | 0.024      | 0.11       | 0.069 $\pm$ 0.029               | 0.049 - 0.09    |
|                       | Italy   | 0.027      | 0.11       | 0.07 $\pm$ 0.029                | 0.051 - 0.089   |
|                       | Iran2   | 0.069      | 0.13       | 0.093 $\pm$ 0.022               | 0.08 - 0.11     |
|                       | Russia  | 0.039      | 0.32       | 0.11 $\pm$ 0.068                | 0.094 - 0.13    |
|                       | Iran1   | 0.026      | 0.24       | 0.094 $\pm$ 0.048               | 0.08 - 0.11     |

Table 6: Descriptive statistics of Average Hausdorff Distance for lung and lesion in different datasets

| <b>Average Hausdorff Distance</b> | <b>Datasets</b> | <b>Min</b> | <b>Max</b> | <b>Mean <math>\pm</math> SD</b> | <b>95% CI</b>   |
|-----------------------------------|-----------------|------------|------------|---------------------------------|-----------------|
| <b>Lung</b>                       | All EVS         | 0.005      | 0.14       | $0.022 \pm 0.026$               | 0.018 - 0.027   |
|                                   | China           | 0.011      | 0.058      | $0.022 \pm 0.014$               | 0.014 - 0.031   |
|                                   | Italy           | 0.011      | 0.031      | $0.018 \pm 0.0062$              | 0.014 - 0.022   |
|                                   | Iran2           | 0.015      | 0.034      | $0.022 \pm 0.0063$              | 0.019 - 0.026   |
|                                   | Russia          | 0.005      | 0.02       | $0.0077 \pm 0.0028$             | 0.0069 - 0.0085 |
|                                   | Iran1           | 0.011      | 0.14       | $0.04 \pm 0.035$                | 0.03 - 0.051    |
| <b>Lesion</b>                     | All EVS         | 0.043      | 5.6        | $0.42 \pm 0.73$                 | 0.29 - 0.55     |
|                                   | Italy           | 0.043      | 0.22       | $0.11 \pm 0.055$                | 0.068 - 0.14    |
|                                   | China           | 0.057      | 1          | $0.3 \pm 0.31$                  | 0.099 - 0.5     |
|                                   | Iran2           | 0.12       | 0.38       | $0.23 \pm 0.092$                | 0.17 - 0.29     |
|                                   | Russia          | 0.068      | 5.6        | $0.65 \pm 0.95$                 | 0.38 - 0.92     |
|                                   | Iran1           | 0.054      | 3.6        | $0.3 \pm 0.6$                   | 0.13 - 0.48     |

Table 7: Descriptive statistics of Mean Surface Distance for lung and lesion in different datasets

| <b>Mean Surface Distance</b> | <b>Datasets</b> | <b>Min</b> | <b>Max</b> | <b>Mean <math>\pm</math> SD</b> | <b>95% CI</b>   |
|------------------------------|-----------------|------------|------------|---------------------------------|-----------------|
| <b>Lung</b>                  | All EVS         | 0.0056     | 0.17       | $0.026 \pm 0.028$               | 0.021 - 0.031   |
|                              | China           | 0.012      | 0.093      | $0.032 \pm 0.023$               | 0.018 - 0.047   |
|                              | Italy           | 0.014      | 0.038      | $0.026 \pm 0.0085$              | 0.021 - 0.032   |
|                              | Iran2           | 0.017      | 0.072      | $0.028 \pm 0.017$               | 0.017 - 0.038   |
|                              | Russia          | 0.0056     | 0.02       | $0.009 \pm 0.0032$              | 0.0081 - 0.0099 |
|                              | Iran1           | 0.012      | 0.17       | $0.045 \pm 0.038$               | 0.034 - 0.056   |
| <b>Lesion</b>                | All EVS         | 0.046      | 6.1        | $0.45 \pm 0.79$                 | 0.31 - 0.59     |
|                              | Italy           | 0.046      | 0.21       | $0.12 \pm 0.05$                 | 0.082 - 0.15    |
|                              | China           | 0.066      | 1          | $0.31 \pm 0.3$                  | 0.11 - 0.51     |
|                              | Iran2           | 0.13       | 0.38       | $0.24 \pm 0.091$                | 0.18 - 0.29     |
|                              | Russia          | 0.075      | 6.1        | $0.69 \pm 1$                    | 0.4 - 0.99      |
|                              | Iran1           | 0.057      | 3.9        | $0.32 \pm 0.64$                 | 0.14 - 0.51     |

Table 8: Descriptive statistics of relative mean Hounsfield Unit difference (%) for lung and lesion in different datasets

| Relative Mean HU Diff (%) | Datasets | Min   | Max  | Mean ± SD    | 95% CI       |
|---------------------------|----------|-------|------|--------------|--------------|
| <b>Lung</b>               | All EVS  | -4.2  | 3.9  | 0.03 ± 0.84  | -0.12 – 0.18 |
|                           | Iran1    | -4.2  | 3.9  | -0.15 ± 1.3  | -0.52 – 0.23 |
|                           | Russia   | -0.7  | 1.3  | 0.27 ± 0.31  | 0.19 - 0.36  |
|                           | Iran2    | -0.46 | 1.3  | -0.02 ± 0.49 | -0.32 – 0.28 |
|                           | China    | -0.93 | 0.77 | -0.11 ± 0.63 | -0.5 – 0.28  |
|                           | Italy    | -1.3  | 0.94 | -0.25 ± 0.67 | -0.69 – 0.19 |
| <b>Lesion</b>             | All EVS  | -9.8  | 10   | -0.8 - 0.44  | -0.18 ± 3.4  |
|                           | Iran1    | -9.8  | 10   | -1.5 - 1.1   | -0.18 ± 4.4  |
|                           | Russia   | -6.9  | 4.6  | -1.2 - 0.42  | -0.38 ± 2.7  |
|                           | Iran2    | -3.2  | 0.74 | -1.2 - 0.27  | -0.45 ± 1.2  |
|                           | China    | -2.5  | 7.4  | -1.5 - 2.4   | 0.46 ± 3     |
|                           | Italy    | -1    | 8.9  | -1.8 - 2.9   | 0.55 ± 3.4   |

Table 9: Descriptive statistics of absolute relative mean Hounsfield Unit difference (%) for lung and lesion in different datasets

| Absolute Relative Mean HU Diff (%) | Datasets | Min   | Max  | Mean ± SD   | 95% CI       |
|------------------------------------|----------|-------|------|-------------|--------------|
| <b>Lung</b>                        | All EVS  | 0.006 | 4.2  | 0.52 ± 0.66 | 0.4 - 0.64   |
|                                    | Iran1    | 0.012 | 4.2  | 0.79 ± 0.98 | 0.5 - 1.1    |
|                                    | Russia   | 0.006 | 1.3  | 0.33 ± 0.24 | 0.26 - 0.4   |
|                                    | Iran2    | 0.082 | 1.3  | 0.31 ± 0.37 | 0.081 - 0.54 |
|                                    | China    | 0.062 | 0.93 | 0.54 ± 0.3  | 0.36 - 0.73  |
|                                    | Italy    | 0.012 | 1.3  | 0.52 ± 0.47 | 0.21 - 0.83  |
| <b>Lesion</b>                      | All EVS  | 0.026 | 10   | 2.4 ± 2.5   | 1.9 - 2.8    |
|                                    | Iran1    | 0.026 | 10   | 3.2 ± 3     | 2.3 - 4.1    |
|                                    | Russia   | 0.036 | 6.9  | 2 ± 1.8     | 1.5 - 2.6    |
|                                    | Iran2    | 0.18  | 3.2  | 0.83 ± 0.91 | 0.26 - 1.4   |
|                                    | China    | 0.46  | 7.4  | 2.1 ± 2.2   | 0.66 - 3.5   |
|                                    | Italy    | 0.27  | 8.9  | 1.7 ± 2.9   | -0.27 – 3.7  |

Table 10: Descriptive statistics of relative volume difference (%) for lung and lesion in different datasets

| Relative Volume Diff (%) | Datasets |       |      |                  |               |
|--------------------------|----------|-------|------|------------------|---------------|
|                          |          | Min   | Max  | Mean $\pm$ SD    | 95% CI        |
| <b>Lung</b>              | All EVS  | -3.1  | 6.4  | $0.38 \pm 1.2$   | 0.16 - 0.59   |
|                          | Iran1    | -3.1  | 6.4  | $0.83 \pm 1.5$   | 0.38 - 1.3    |
|                          | Russia   | -1.6  | 0.86 | $-0.33 \pm 0.41$ | -0.44 - -0.21 |
|                          | Iran2    | -0.3  | 1.9  | $0.99 \pm 0.59$  | 0.63 - 1.4    |
|                          | China    | -0.79 | 2.4  | $0.92 \pm 1.1$   | 0.25 - 1.6    |
|                          | Italy    | -1.1  | 2.8  | $0.8 \pm 1.2$    | 0.0045 - 1.6  |
| <b>Lesion</b>            | All EVS  | -14   | 21   | $0.81 \pm 6.6$   | -0.39 - 2     |
|                          | Iran1    | -14   | 15   | $1 \pm 6.1$      | -0.82 - 2.8   |
|                          | Russia   | -14   | 21   | $1.7 \pm 8$      | -0.58 - 4.1   |
|                          | Iran2    | -14   | 4.1  | $-1.3 \pm 4.7$   | -4.2 - 1.6    |
|                          | China    | -9.2  | 1.9  | $-3.6 \pm 3.8$   | 6.1 - -1.1    |
|                          | Italy    | -0.63 | 6.5  | $2.2 \pm 2.2$    | 0.62 - 3.7    |

Table 11: Descriptive statistics of absolute relative volume difference (%) for lung and lesion in different datasets

| Absolute Relative Volume Diff (%) | Datasets |        |     |                 |             |
|-----------------------------------|----------|--------|-----|-----------------|-------------|
|                                   |          | Min    | Max | Mean $\pm$ SD   | 95% CI      |
| <b>Lung</b>                       | All EVS  | 0.0047 | 6.4 | $0.89 \pm 0.88$ | 0.73 - 1    |
|                                   | Iran1    | 0.031  | 6.4 | $1.3 \pm 1.1$   | 0.97 - 1.6  |
|                                   | Russia   | 0.0047 | 1.6 | $0.41 \pm 0.32$ | 0.32 - 0.5  |
|                                   | Iran2    | 0.3    | 1.9 | $1.1 \pm 0.46$  | 0.77 - 1.3  |
|                                   | China    | 0.19   | 2.4 | $1.1 \pm 0.81$  | 0.65 - 1.6  |
|                                   | Italy    | 0.016  | 2.8 | $1.1 \pm 0.95$  | 0.46 - 1.7  |
| <b>Lesion</b>                     | All EVS  | 0.018  | 21  | $4.8 \pm 4.6$   | 4 - 5.6     |
|                                   | Iran1    | 0.049  | 15  | $4.7 \pm 3.9$   | 3.6 - 5.9   |
|                                   | Russia   | 0.087  | 21  | $6 \pm 5.5$     | 4.4 - 7.6   |
|                                   | Iran2    | 0.018  | 14  | $2.6 \pm 4.1$   | 0.036 - 5.1 |
|                                   | China    | 0.33   | 9.2 | $4 \pm 3.3$     | 1.9 - 6.1   |
|                                   | Italy    | 0.23   | 6.5 | $2.3 \pm 2$     | 0.9 - 3.7   |

Table 12: Descriptive statistics of relative and absolute relative volume difference lesion/lung (%)

| <b>Volume Diff lesion/Lesion (%)</b> | <b>Datasets</b> | <b>Min</b> | <b>Max</b> | <b>Mean <math>\pm</math> SD</b> | <b>95% CI</b> |
|--------------------------------------|-----------------|------------|------------|---------------------------------|---------------|
| <b>RE</b>                            | All             | -14        | 16         | 0.22 $\pm$ 6.3                  | -0.95 - 1.4   |
|                                      | Iran1           | -14        | 14         | 0.46 $\pm$ 6.2                  | -1.4 - 2.3    |
|                                      | Russia          | -14        | 16         | 1.3 $\pm$ 7.3                   | -0.89 - 3.5   |
|                                      | Iran2           | -14        | 2.7        | -2.3 $\pm$ 4.6                  | -5.1 - 0.55   |
|                                      | China           | -9.6       | -0.0047    | -4.4 $\pm$ 3.3                  | -6.5 - -2.2   |
|                                      | Italy           | -0.65      | 6.3        | 1.5 $\pm$ 2.3                   | -0.15 - 3.1   |
| <b>ARE</b>                           | All             | 0.0047     | 16         | 4.7 $\pm$ 4.2                   | 3.9 - 5.5     |
|                                      | Iran1           | 0.23       | 14         | 5 $\pm$ 3.7                     | 3.9 - 6.1     |
|                                      | Russia          | 0.23       | 16         | 5.5 $\pm$ 4.8                   | 4.1 - 6.9     |
|                                      | Iran2           | 0.034      | 14         | 2.8 $\pm$ 4.2                   | 0.22 - 5.4    |
|                                      | China           | 0.0047     | 9.6        | 4.4 $\pm$ 3.3                   | 2.2 - 6.5     |
|                                      | Italy           | 0.2        | 6.3        | 1.8 $\pm$ 2                     | 0.39 - 3.2    |

Table 13: Descriptive statistics of relative volume (Lesion/Lung) for ground truth and predict images

| <b>RV GT</b>     | <b>Datasets</b> | <b>Min</b> | <b>Max</b> | <b>Mean <math>\pm</math> SD</b> | <b>Mean (95% CI)</b> |
|------------------|-----------------|------------|------------|---------------------------------|----------------------|
| <b>GT</b>        | All             | 0.00097    | 0.82       | 0.13 $\pm$ 0.19                 | 0.095 - 0.16         |
|                  | Iran1           | 0.018      | 0.82       | 0.25 $\pm$ 0.23                 | 0.18 - 0.32          |
|                  | Russia          | 0.00097    | 0.088      | 0.018 $\pm$ 0.016               | 0.013 - 0.023        |
|                  | Iran2           | 0.014      | 0.3        | 0.085 $\pm$ 0.091               | 0.029 - 0.14         |
|                  | China           | 0.0088     | 0.59       | 0.16 $\pm$ 0.19                 | 0.04 - 0.28          |
|                  | Italy           | 0.0064     | 0.56       | 0.12 $\pm$ 0.19                 | -0.004 - 0.25        |
| <b>Predicted</b> | All             | 0.0011     | 0.84       | 0.13 $\pm$ 0.19                 | 0.094 - 0.16         |
|                  | Iran1           | 0.018      | 0.84       | 0.25 $\pm$ 0.23                 | 0.18 - 0.32          |
|                  | Russia          | 0.0011     | 0.081      | 0.018 $\pm$ 0.015               | 0.013 - 0.022        |
|                  | Iran2           | 0.014      | 0.29       | 0.082 $\pm$ 0.088               | 0.028 - 0.14         |
|                  | China           | 0.0087     | 0.57       | 0.15 $\pm$ 0.18                 | 0.037 - 0.27         |
|                  | Italy           | 0.0064     | 0.56       | 0.13 $\pm$ 0.19                 | -0.003 - 0.25        |
